# Supplementary material
Source: PubMed Central journal article supplement (PMC4873393)
Supplement: NIHMS778415-supplement-1.pdf [file NIHMS778415-supplement-1.pdf]

| shRNA                   | Species | Sequence                                                                                                |
|-------------------------|---------|---------------------------------------------------------------------------------------------------------|
| ITGB1-1                 | Human   | TGCTGTTGACAGTGAGCGCCAGATGAAAATAGATGTTAATAGTGAAGCCACAGATGTATTAACATCTATTTTCATCTGTTGCCTACTGCCTCGGA         |
| ITGB1-2                 | Human   | TGCTGTTGACAGTGAGCGCACCGAGCAATTTTCTGCTAAATAGTGAAGCCACAGATGTATTTAGCAGAAAATTGCTCGGTTTGCCTACTGCCTCGGA       |
| ITGB1-3                 | Human   | TGCTGTTGACAGTGAGCGCCCGAGCAATTTTCTGCTAAAATAGTGAAGCCACAGATGTATTTAGCAGAAAATTGCTCGGTTGCCTACTGCCTCGGA        |
| ITGB1-4                 | Human   | TGCTGTTGACAGTGAGCGACCGGTGAAAATCCTATTTATATAGTGAAGCCACAGATGTATATAAATAGGATTTTACCCGGCTGCCTACTGCCTCGGA       |
| ITGB1-5                 | Human   | TGCTGTTGACAGTGAGCGCTCCACAACTGAATGCAAATAGTGAAGCCACAGATGTATTTGCATTGAGTTGTTGGGATTGCCTACTGCCTCGGA           |
| ITGB1-6                 | Human   | TGCTGTTGACAGTGAGCGAAAGAGGGATAATACAAATGAATAGTGAAGCCACAGATGTATTCATTTGATTATCCCTCTTGCCTACTGCCTCGGA          |
| ITGB1-7                 | Human   | TGCTGTTGACAGTGAGCGAAGCCACAGACATTTACATTAATAGTGAAGCCACAGATGTATTAATGAAATGCTGTGGCTCTGCCTACTGCCTCGGA         |
| ITGB1-8                 | Human   | TGCTGTTGACAGTGAGCGCCGGGTGAAAATCCTATTTATATAGTGAAGCCACAGATGTATATAAATAGGATTTTACCCGGTGCCTACTGCCTCGGA        |
| ITGB3-1                 | Human   | TGCTGTTGACAGTGAGCGCTCCAACATTTGTTAATAGTTATAGTGAAGCCACAGATGTATACTATTAACAAATGTTGGAATGCCTACTGCCTCGGA        |
| ITGB3-2                 | Human   | TGCTGTTGACAGTGAGCGACCGCTTCAATGAGGAAGTGAATAGTGAAGCCACAGATGTATTCATCTCCTCATTGAAGCGGGTGCCTACTGCCTCGGA       |
| ITGB3-3                 | Human   | TGCTGTTGACAGTGAGCGAAAGAGCAGATGTCATTCCATATAGTGAAGCCACAGATGTATATGGAATGACATCTGCTCTTGTGCCTACTGCCTCGGA       |
| ITGB3-4                 | Human   | TGCTGTTGACAGTGAGCGATACCCTGAGTTCATAAATTTATAGTGAAGCCACAGATGTATAAATTTATGAAGTACAGGTTAGTGCCTACTGCCTCGGA      |
| ITGB3-5                 | Human   | TGCTGTTGACAGTGAGCGACCCTGCTACCTTCCCAATATAGTGAAGCCACAGATGTATATTGGTGAAGGTAGACGTGGCTGCCTACTGCCTCGGA         |
| ITGB3-6                 | Human   | TGCTGTTGACAGTGAGCGCCCGCTACTACTGCAACTGTATAGTGAAGCCACAGATGTATACAGTTGACAGTAGTAGCCGGTGCCTACTGCCTCGGA        |
| ITGB3-7                 | Human   | TGCTGTTGACAGTGAGCGCAAGGGAGAGAGTGTATTGTATAGTGAAGCCACAGATGTATACAATAGCACTCTCTCCCTTTTGCCTACTGCCTCGGA        |
| ITGB3-8                 | Human   | TGCTGTTGACAGTGAGCGCTGGCAGTATGGTAGAGGGATATAGTGAAGCCACAGATGTATATCCCTCTACCATACTGCCATTGCCTACTGCCTCGGA       |
| Firefly Luciferase (FF) |         | AAGGTATATTGCTGTTGACAGTGAGCGAGCTCCCGTGAATTGGAATCCTAGTGAAGCCACAGATGTAGGATTCCAATTCAGCGGGAGCCTGCCTACTGCCTCG |
| ITGA1-2                 | Mouse   | TGCTGTTGACAGTGAGCGCCCAACAAAGTGAATATTCAATAGTGAAGCCACAGATGTATTGAATATTCACITTTGTTGGGTTGCCTACTGCCTCGGA       |
| ITGA1-3                 | Mouse   | TGCTGTTGACAGTGAGCGACCCGGCTAATGTTATATTGTATAGTGAAGCCACAGATGTATACAATATAACATTAGCCGGGGTGCCTACTGCCTCGGA       |
| ITGA1-5                 | Mouse   | TGCTGTTGACAGTGAGCGCCTGGATGGTCATCTTCTGATATAGTGAAGCCACAGATGTATATCAGAAGATGACCATCCAGTTGCCTACTGCCTCGGA       |
| ITGA2-2                 | Mouse   | TGCTGTTGACAGTGAGCGACCCGTGATCTTTCCTAAACAATAGTGAAGCCACAGATGTATTGTTAGGAAAGATCACGGGCTGCCTACTGCCTCGGA        |
| ITGA2-6                 | Mouse   | TGCTGTTGACAGTGAGCGACTGAAAGACCTTACATGAAATAGTGAAGCCACAGATGTATTTGATGGAAGGTCTTTCAGCTGCCTACTGCCTCGGA         |
| ITGA2-7                 | Mouse   | TGCTGTTGACAGTGAGCGCCAGGGCGATGGGATACTTCTATAGTGAAGCCACAGATGTATAGAAGTATCCCATCGCCCTGTTGCCTACTGCCTCGGA       |
| ITGA3-1                 | Mouse   | TGCTGTTGACAGTGAGCGAATGGACAATGTTCCGATAAATAGTGAAGCCACAGATGTATTTATCGGAACATTGTCCATCTGCCTACTGCCTCGGA         |
| ITGA3-6                 | Mouse   | TGCTGTTGACAGTGAGCGCCAGCTACATGATTGAGCGGAATAGTGAAGCCACAGATGTATCCGCTGAATCATGTAGCTGTTGCCTACTGCCTCGGA        |
| ITGA3-7                 | Mouse   | TGCTGTTGACAGTGAGCGCCCGGATTATGCCCAAGTACCATAGTGAAGCCACAGATGTATGGTACTTGGGCATAATCCGGTGCCTACTGCCTCGGA        |
| ITGA4-1                 | Mouse   | TGCTGTTGACAGTGAGCGCGGGCATCATGTGATCACCAAATAGTGAAGCCACAGATGTATTTGGTGATCACATGATGCCATGCCTACTGCCTCGGA        |
| ITGA4-2                 | Mouse   | TGCTGTTGACAGTGAGCGCCGACATTTCCACATCATTATTTAGTGAAGCCACAGATGTAAATAATGATGGTGAATGTCGTTGCCTACTGCCTCGGA        |
| ITGA6-1                 | Mouse   | TGCTGTTGACAGTGAGCGCCACCACAGATCTGGATATTAATAGTGAAGCCACAGATGTATTAATATCCAGATCTGTGGTGTGCCTACTGCCTCGGA        |
| ITGA6-2                 | Mouse   | TGCTGTTGACAGTGAGCGCCGATGCATAGTATTGATCTATAGTGAAGCCACAGATGTATAGATCAATACTATGCATCGGATGCCTACTGCCTCGGA        |
| ITGA6-6                 | Mouse   | TGCTGTTGACAGTGAGCGCTAGGGTGAATTAAGTGAAGCCACAGATGTATTCGCTAAGTTAATCACCCATGCCTACTGCCTCGGA                   |
| ITGA8-2                 | Mouse   | TGCTGTTGACAGTGAGCGAAACCTATAGAATTTAAATCAATAGTGAAGCCACAGATGTATTGATTTAAATCTATAGGTTCTGCCTACTGCCTCGGA        |
| ITGA8-3                 | Mouse   | TGCTGTTGACAGTGAGCGCTGGATGATTCTACCTTTAAATAGTGAAGCCACAGATGTATTTAAAGGTAGAATCATCCAAATGCCTACTGCCTCGGA        |
| ITGA8-5                 | Mouse   | TGCTGTTGACAGTGAGCGCCAGATAATTATTGGCGATGAATAGTGAAGCCACAGATGTATTCATCGCCAATAATTATCTGATGCCTACTGCCTCGGA       |
| ITGAV-9                 | Mouse   | TGCTGTTGACAGTGAGCGCCTGCATTGTGCTTATTGTATTAGTGAAGCCACAGATGTAAACAATAAGACACAATGCAGATGCCTACTGCCTCGGA         |
| ITGAV-10                | Mouse   | TGCTGTTGACAGTGAGCGCGCATAGTACCTCTTCACTTAGTGAAGCCACAGATGTAGTAACTGAAGAGGTAATGCCTACTGCCTCGGA                |
| ITGB1-4                 | Mouse   | TGCTGTTGACAGTGAGCGACAGCAGGAGTAAACAATAAATAGTGAAGCCACAGATGTAAATTTATTGTTACTCCGTCTGGCTGCCTACTGCCTCGGA       |
| ITGB1-5                 | Mouse   | TGCTGTTGACAGTGAGCGCGGCTCTCAAATAAAGAAATAGTGAAGCCACAGATGTATTTCTTATAGTTTGGAGAGCCTGCCTACTGCCTCGGA           |
| ITGB2-1                 | Mouse   | TGCTGTTGACAGTGAGCGCGCCATCTTTGCGGTGACAAATAGTGAAGCCACAGATGTATTTGTCACCGCAAAGATGGGCTGCCTACTGCCTCGGA         |
| ITGB2-4                 | Mouse   | TGCTGTTGACAGTGAGCGAGGAAGGCTGTTGGATACTTATAGTGAAGCCACAGATGTATAAGTTATCCAACAGCCTTCCGTGCCTACTGCCTCGGA        |
| ITGB2-5                 | Mouse   | TGCTGTTGACAGTGAGCGAGGAAACAGCTATCTCCACAAATAGTGAAGCCACAGATGTATTTGTGGAGATAGCTGTTCCGTGCCTACTGCCTCGGA        |
| ITGB3-2                 | Mouse   | TGCTGTTGACAGTGAGCGCGCAACAAACCCGCTGTATAAATAGTGAAGCCACAGATGTATTTATACAGCGGGTGTGTTGCTTGCCTACTGCCTCGGA       |
| ITGB3-3                 | Mouse   | TGCTGTTGACAGTGAGCGACCTCTCAGATGCGCAAGCTTATAGTGAAGCCACAGATGTATAAGCTTGCATCTGAGAGGCTGCCTACTGCCTCGGA         |
| ITGB3-9                 | Mouse   | TGCTGTTGACAGTGAGCGAGCAGGCATTGTCTGCCCAATAGTGAAGCCACAGATGTAAATGGGCAGGACAATGCCTGCCTACTGCCTCGGA             |
| ITGB3-10                | Mouse   | TGCTGTTGACAGTGAGCGAGGAAGGAATTTGCTAAATTTGTAGTGAAGCCACAGATGTACAAATTTAGCAAATTCCTCCGTGCCTACTGCCTCGGA        |
| ITGB4-4                 | Mouse   | TGCTGTTGACAGTGAGCGACAGGGTGGAGAAGACTACGAATAGTGAAGCCACAGATGTATTCGTAGTCTTCCACCCTGGTGCCTACTGCCTCGGA         |
| ITGB4-7                 | Mouse   | TGCTGTTGACAGTGAGCGAAGGGTGGAGAAGACTACGAATAGTGAAGCCACAGATGTATTTGATAGTCTTCCACCCTGTGCCTACTGCCTCGGA          |

Supplemental Table 1

| <b>4T1 Cell Line</b> | <b>% Protein Remaining</b> |
|----------------------|----------------------------|
| FF10                 | N/A                        |
| FF32                 | N/A                        |
| Alpha1-2             | 28±8.6                     |
| Alpha1-3             | 63±15.4                    |
| Alpha1-5             | 47±6.7                     |
| Alpha2-2             | 35±0.5                     |
| Alpha2-6             | 37±10                      |
| Alpha2-7-            | 5±1.6                      |
| Alpha3-1-BC-G8       | <10% *                     |
| Alpha3-6-BC-B4       | <10% *                     |
| Alpha3-7-BC-B6       | <10% *                     |
| Alpha4-1-BC-A8       | Protein not detected       |
| Alpha4-2-BC-A2       | Protein not detected       |
| alpha6-1-BC B1       | 12 ±7                      |
| alpha6-2-BC A12      | 12 ±7                      |
| alpha6-6-BC A11      | 21 ±7                      |
| alpha8-2 BC H1       | 6.9 **                     |
| alpha8-3 BC H3       | 13.48 **                   |
| alpha8-5 BC H5       | 7.89 **                    |
| AlphaV-9-BC-E3       | <10% *                     |
| AlphaV-10-BC-E4      | <10% *                     |
| beta1-4-BC A3        | 17±2                       |
| beta1-5-BC A4        | 9±3                        |
| beta2-1-C5           | 9±4                        |
| beta2-4-BC-A6        | 20±4                       |
| beta2-5-BC-A7        | 33±11                      |
| beta3-2-BC-E7        | 15±6.2                     |
| beta3-3-BC-E9        | 42±18.5                    |
| beta3-9-BC-E11       | 42±21.5                    |
| beta3-10-BC-F1       | 1.2±6.2                    |
| beta4-4-BC-F10       | 9±1                        |
| beta4-7-BC-F8        | 7±1                        |

\* Knockdown was confirmed by western blots

\*\* Knockdown was confirmed by qPCR

## Supplemental Table 2
