# Supplementary material
Source: PubMed Central journal article supplement (PMC4873393)
Supplement: NIHMS778415-supplement-2.pdf [file NIHMS778415-supplement-2.pdf]

A

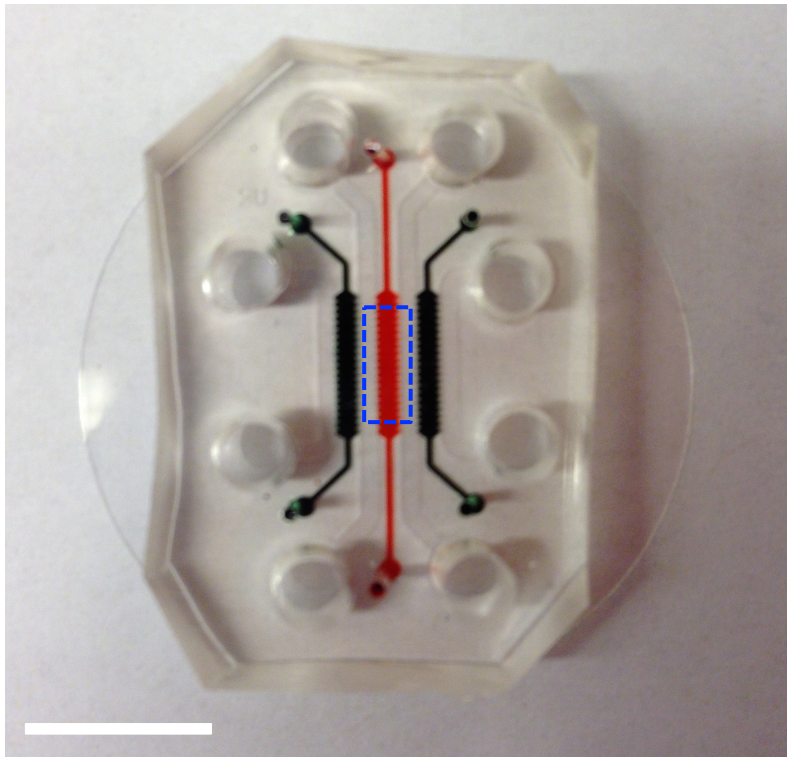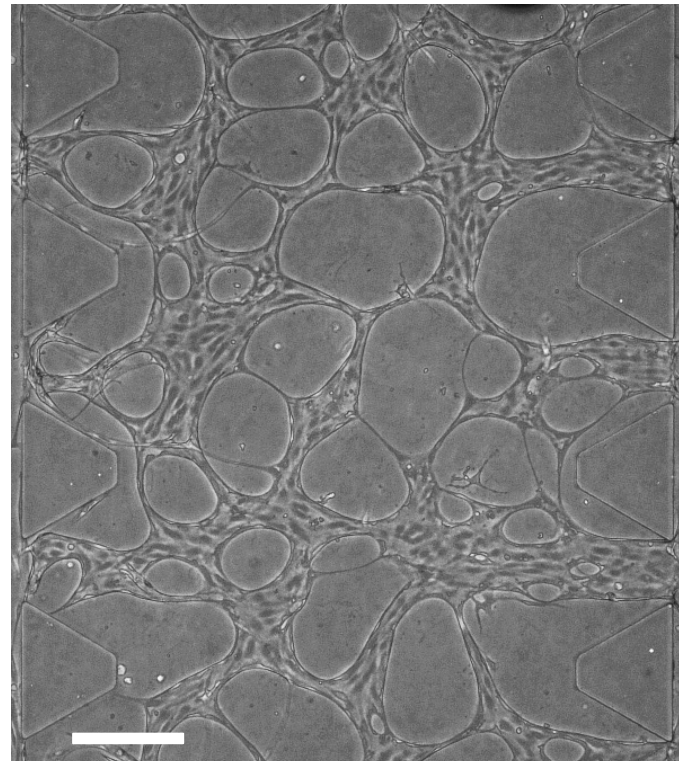

B

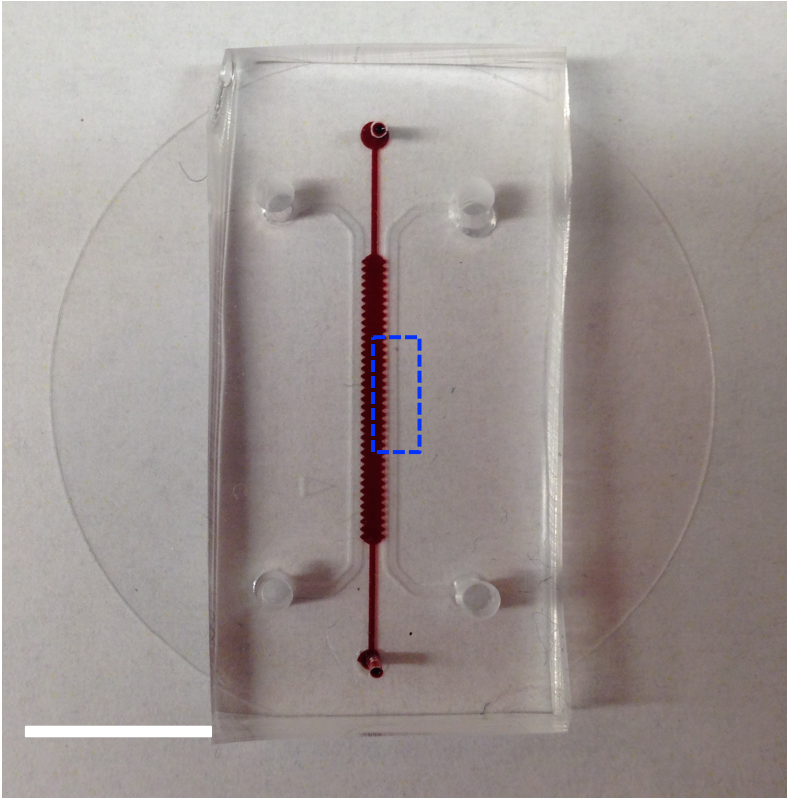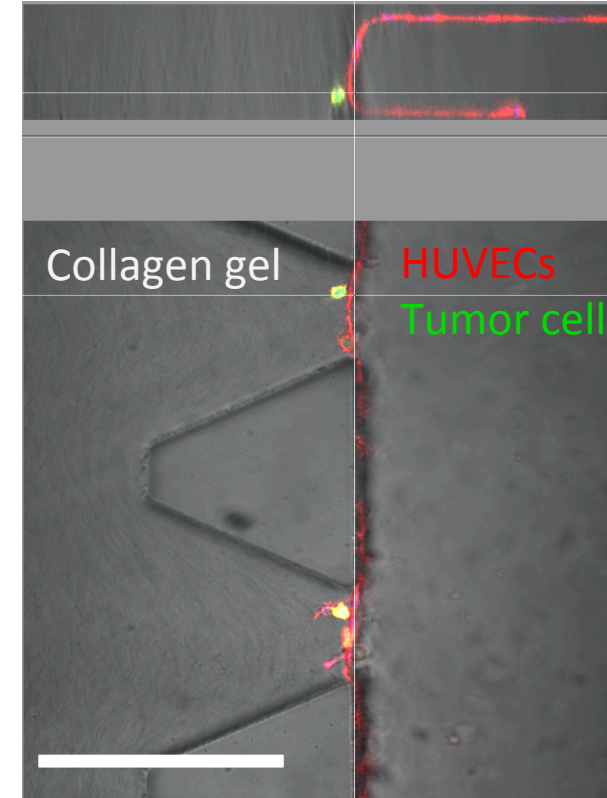

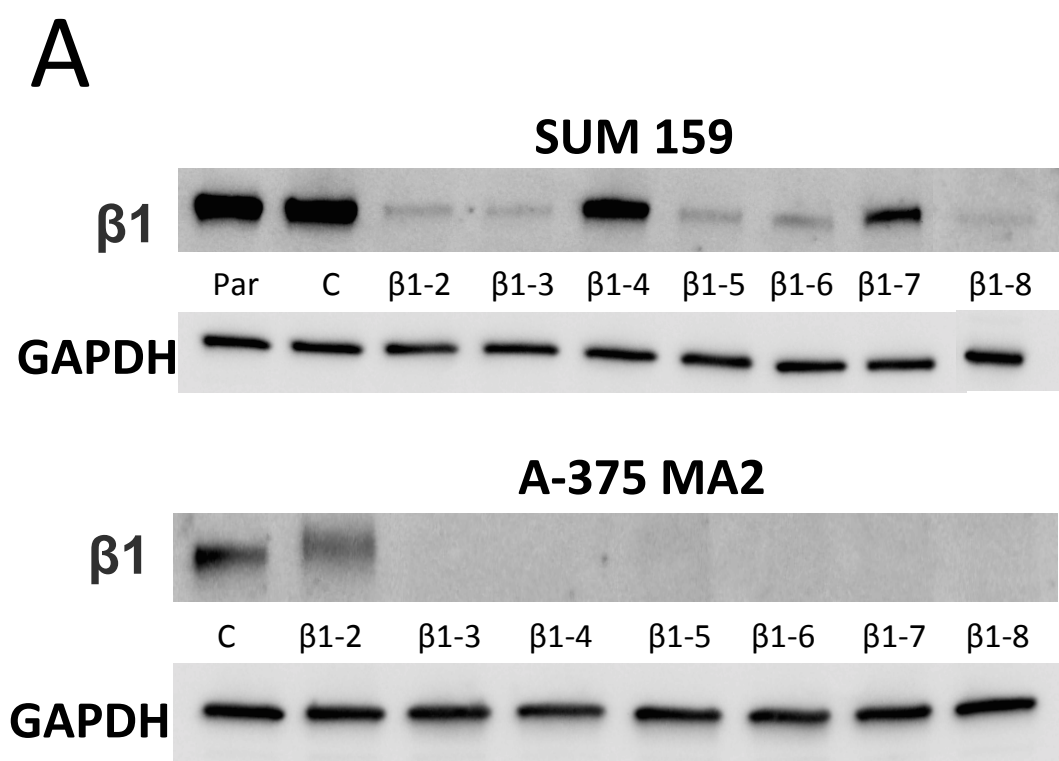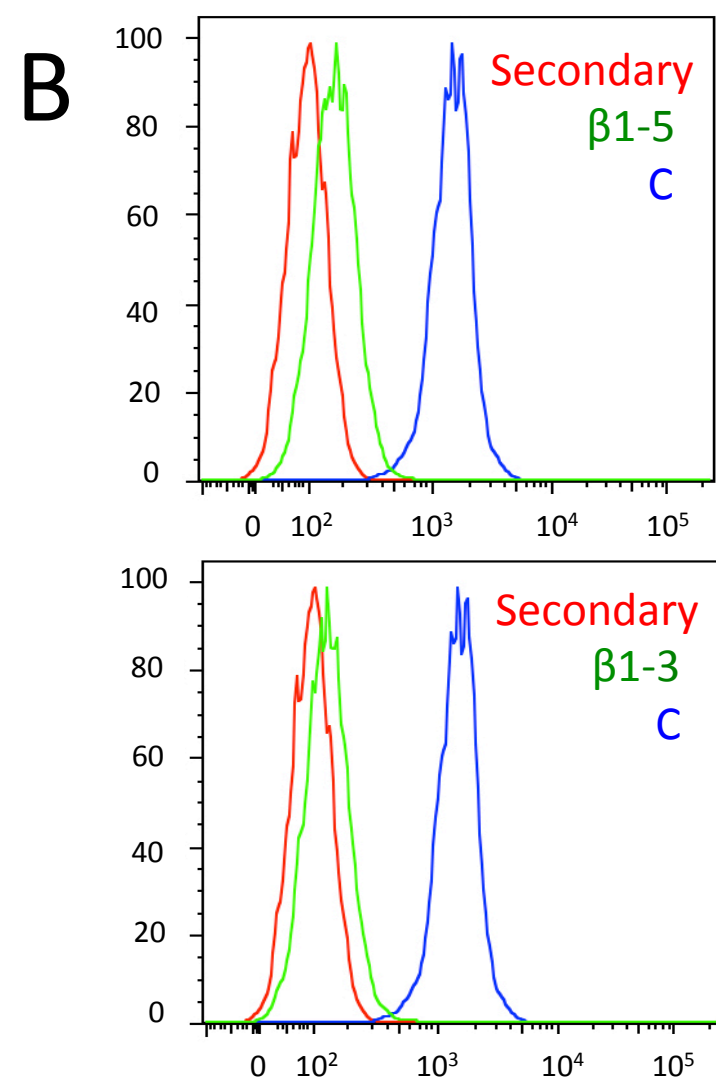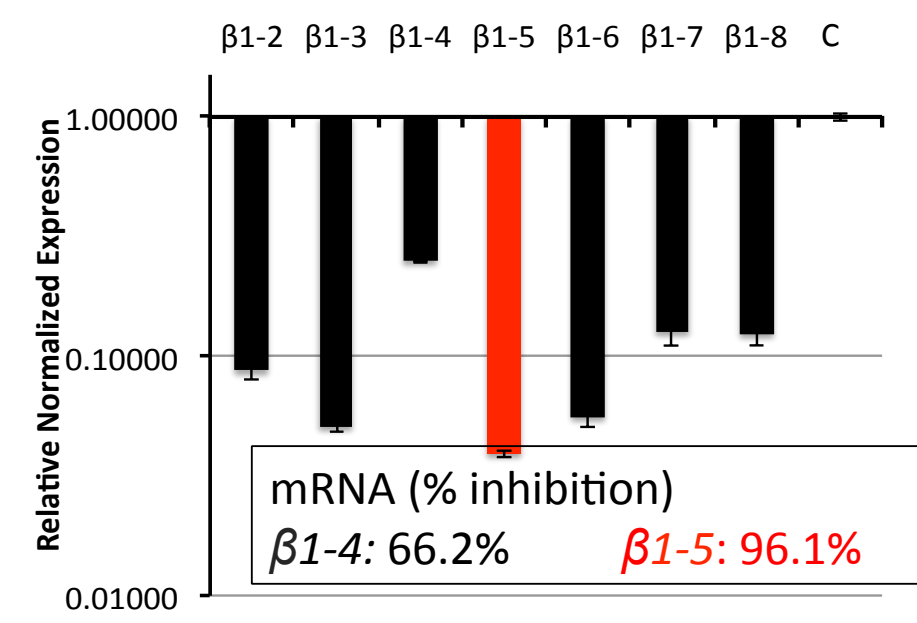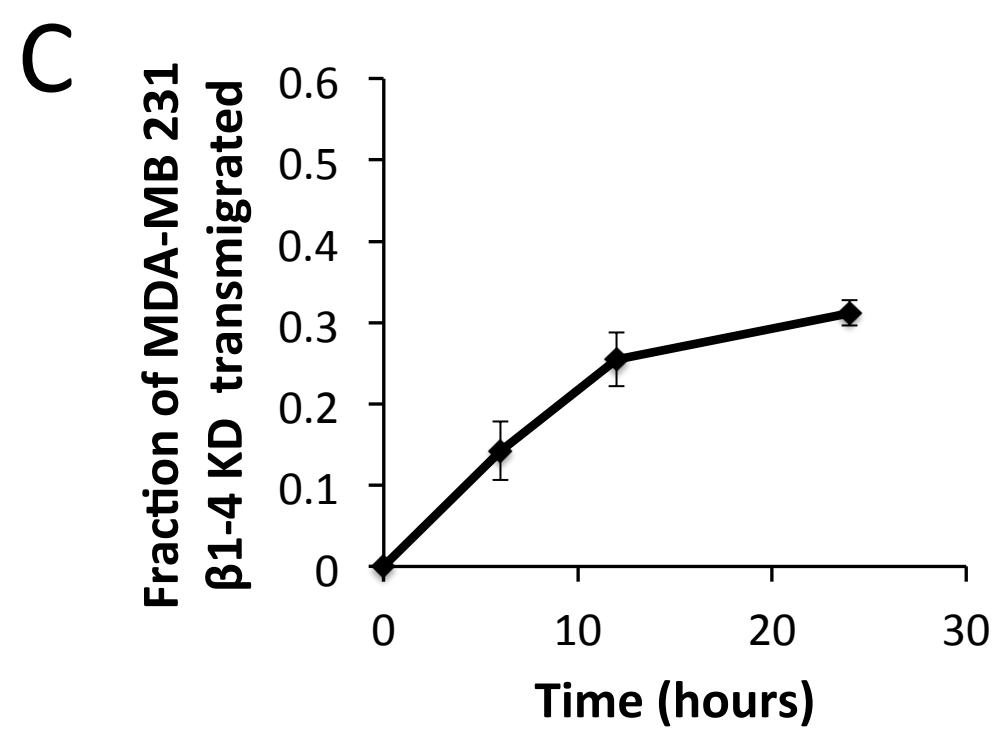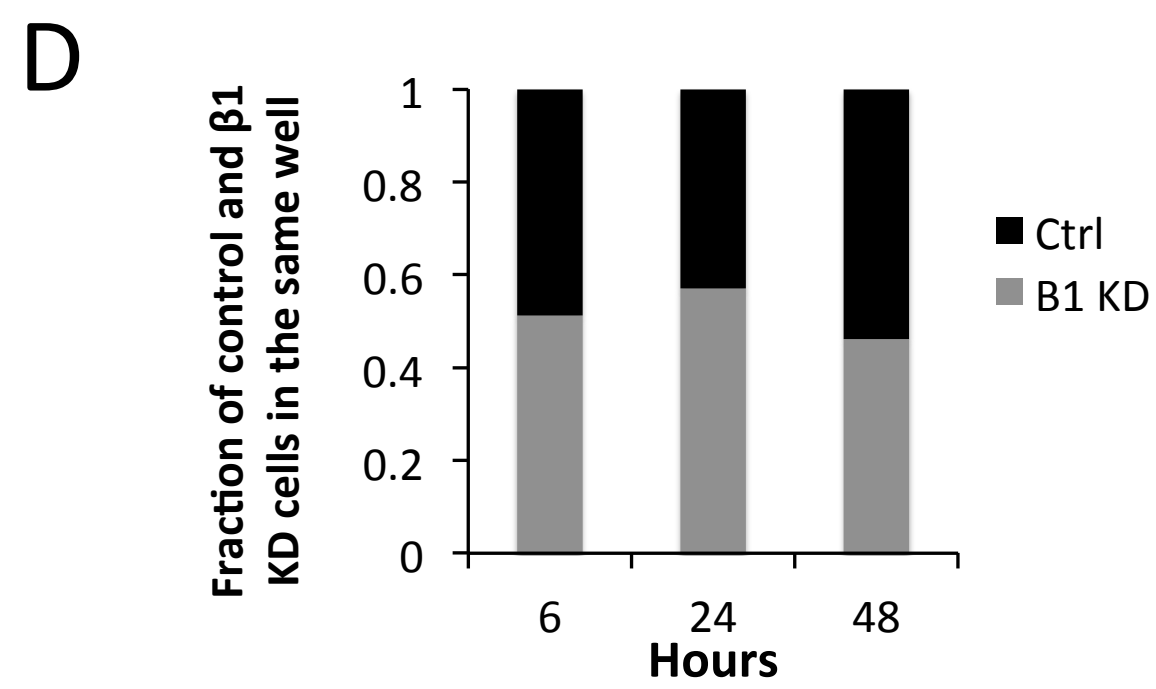

SI Fig 2



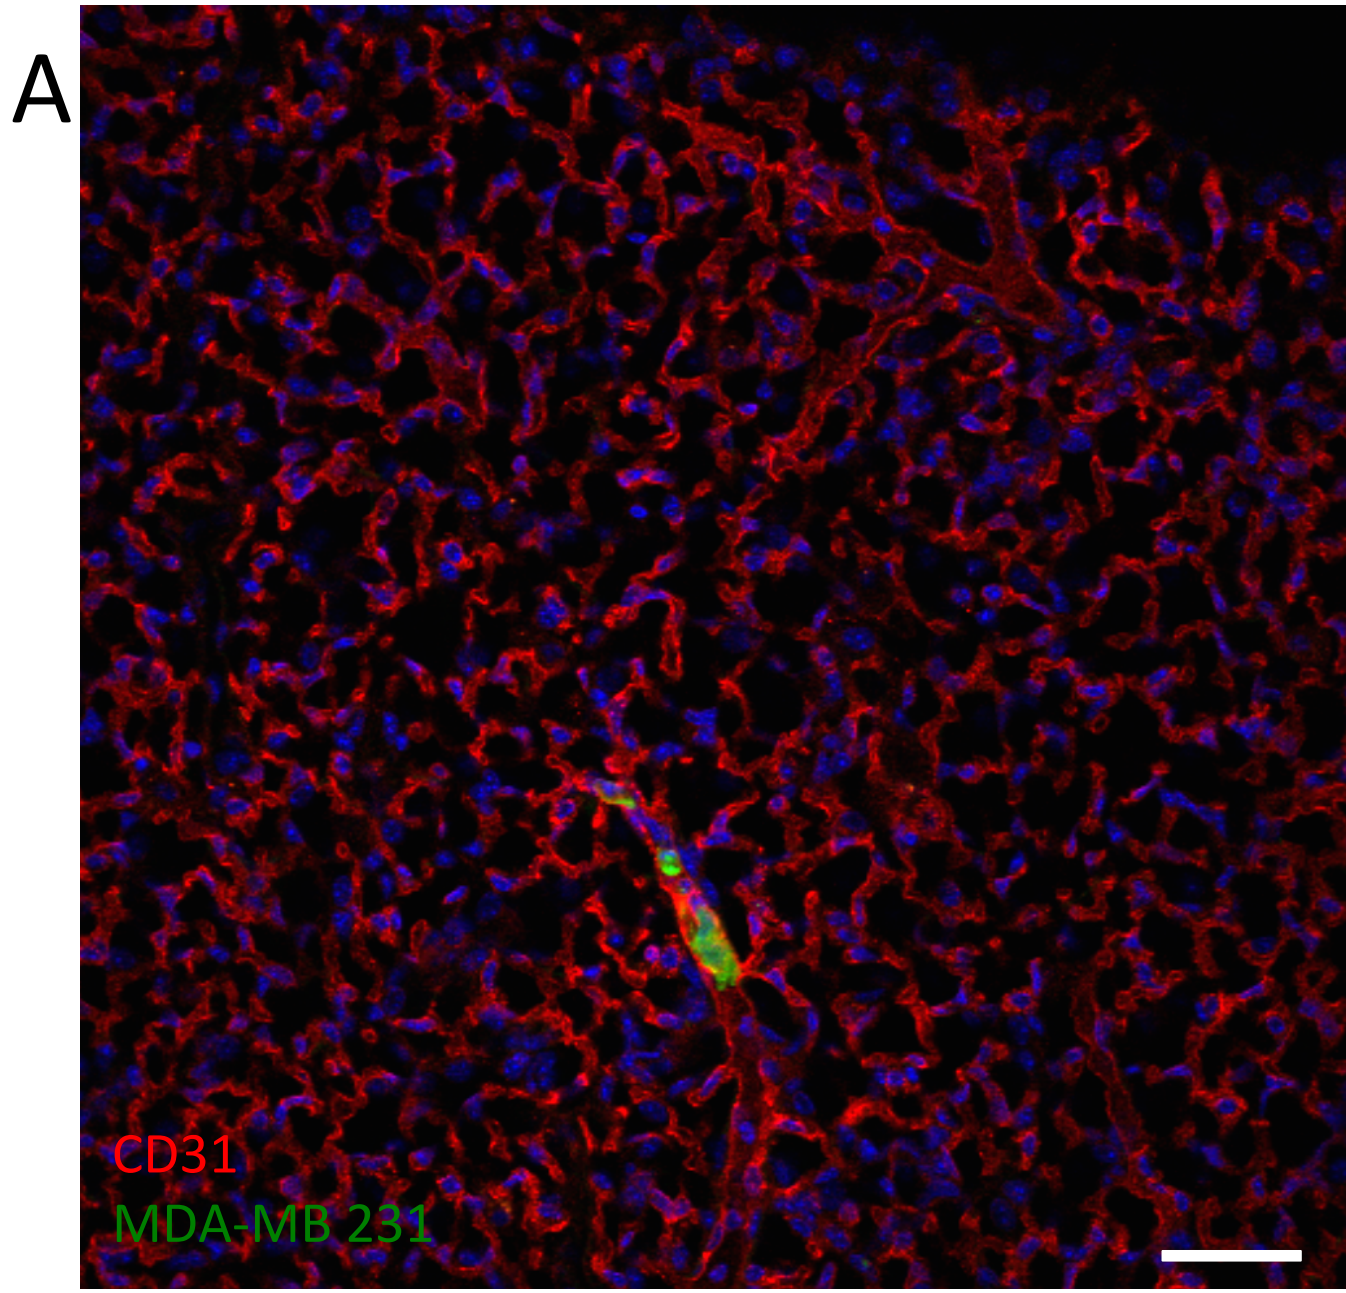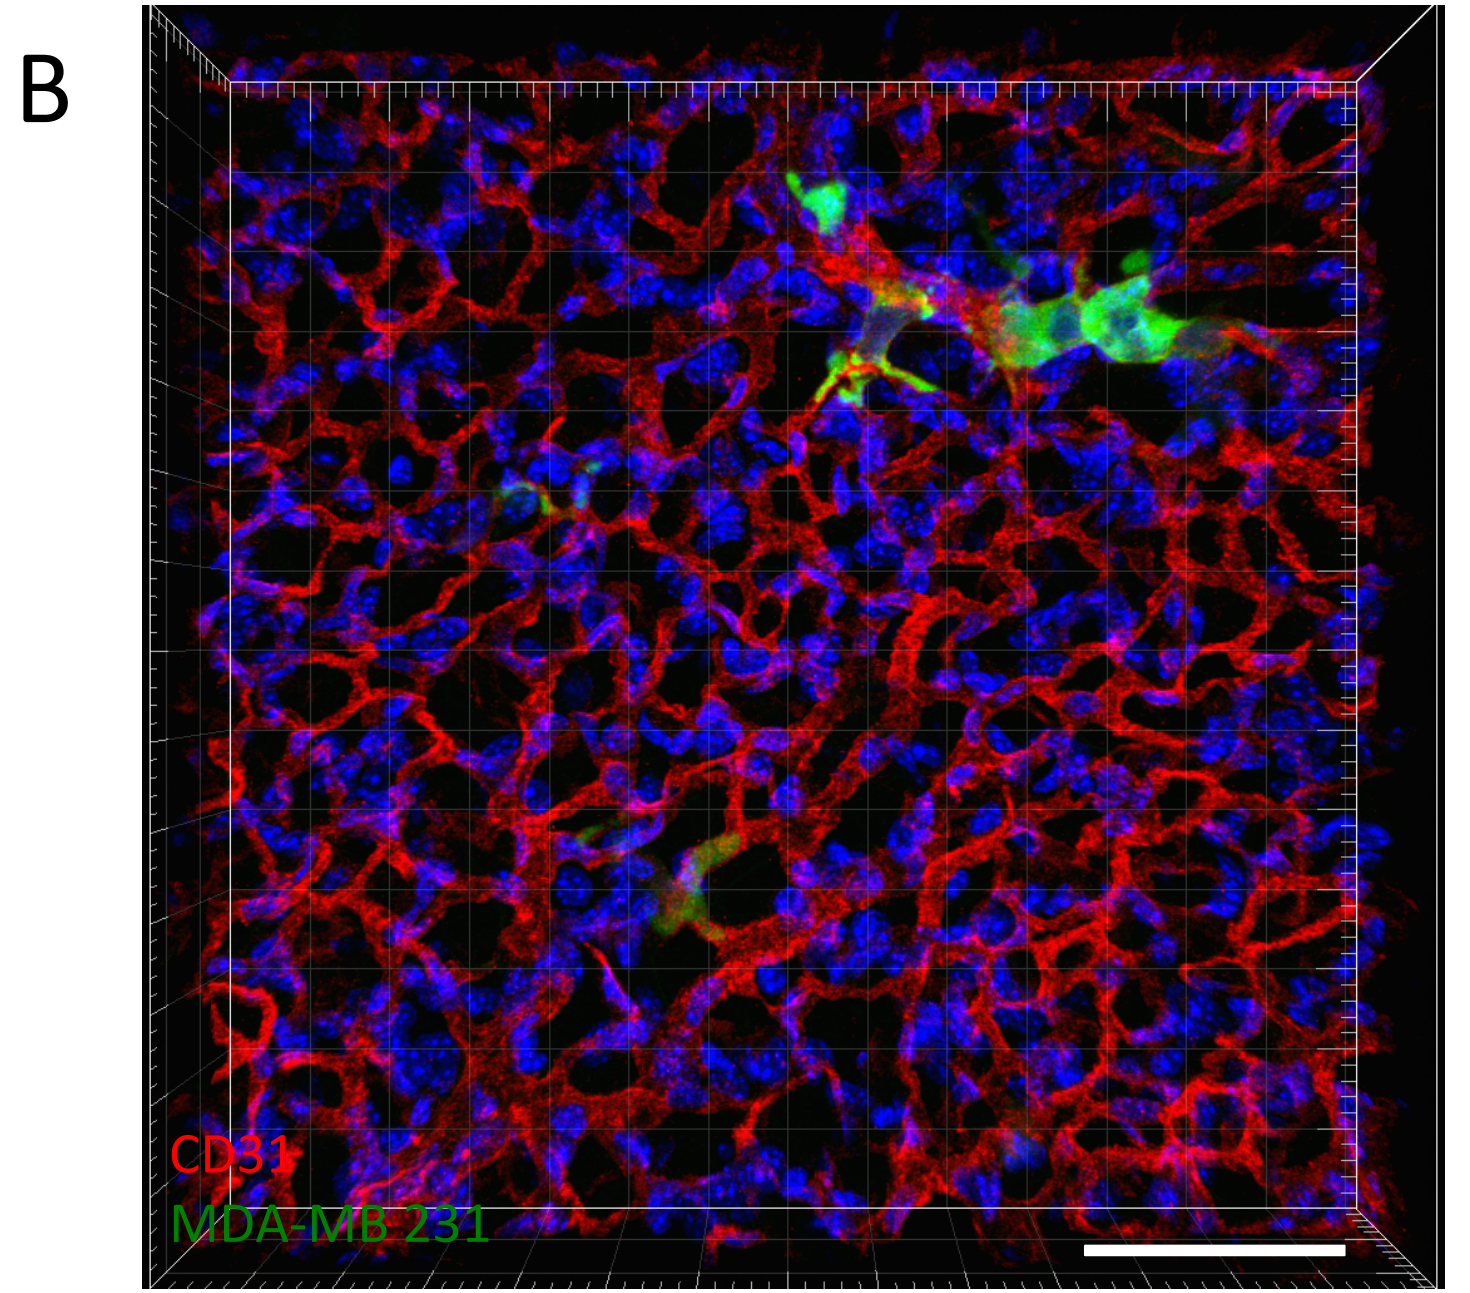

SI Fig 3



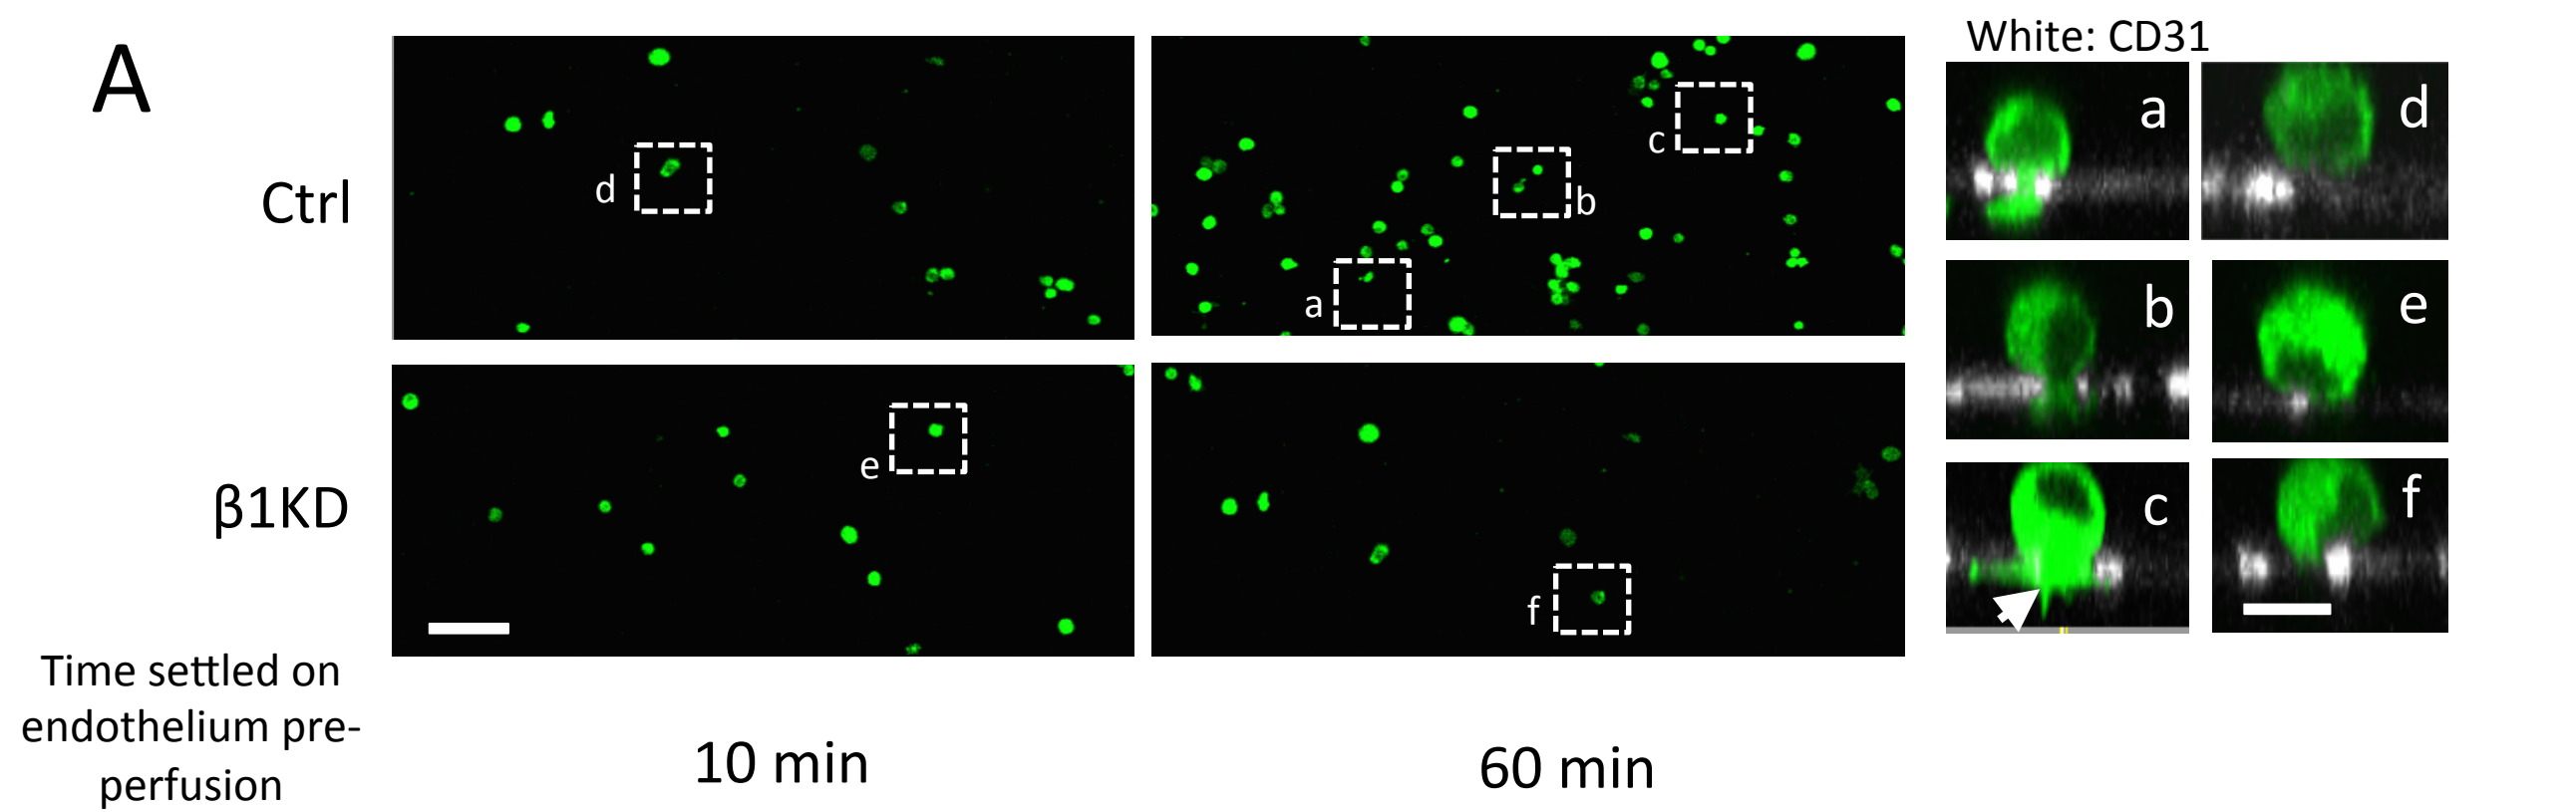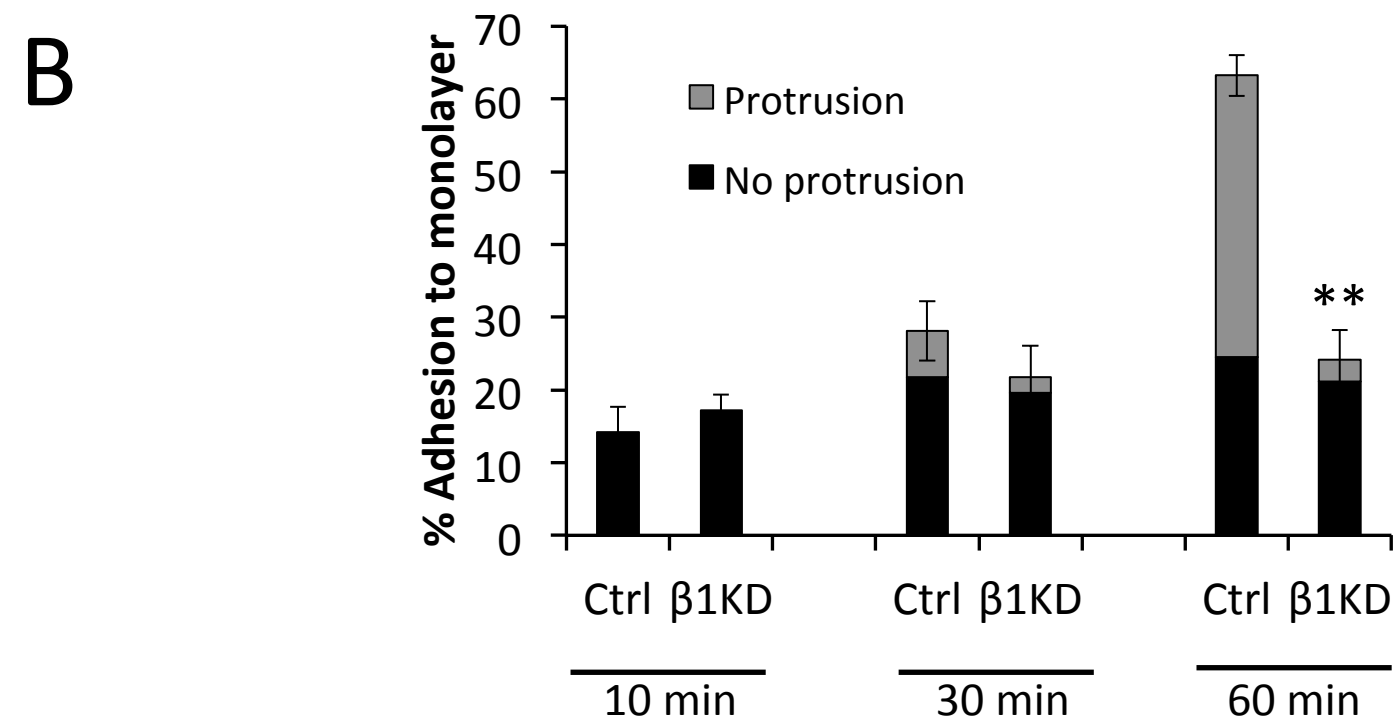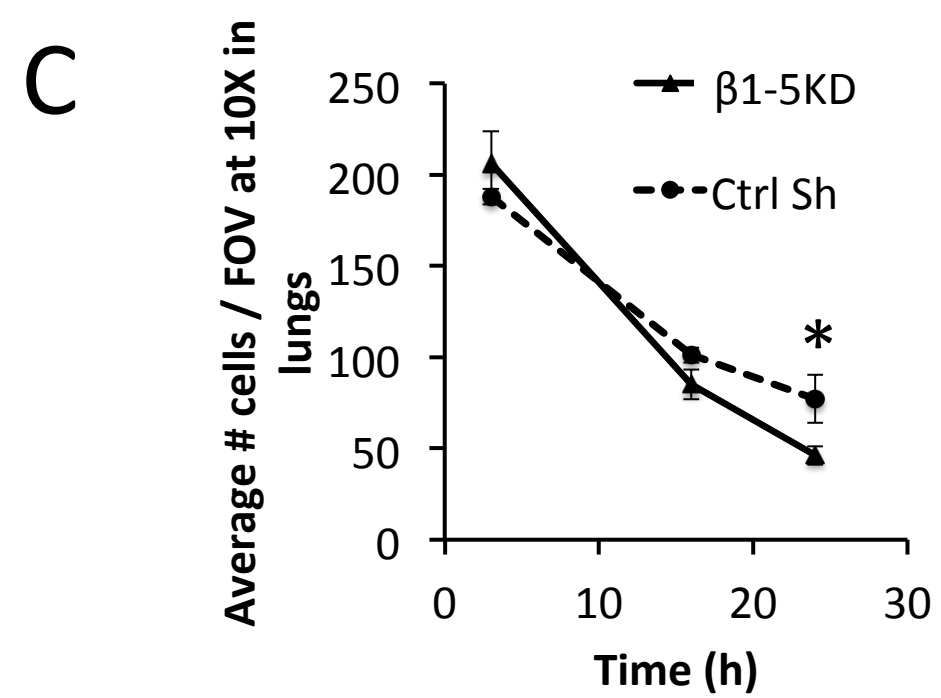

SI Fig 4



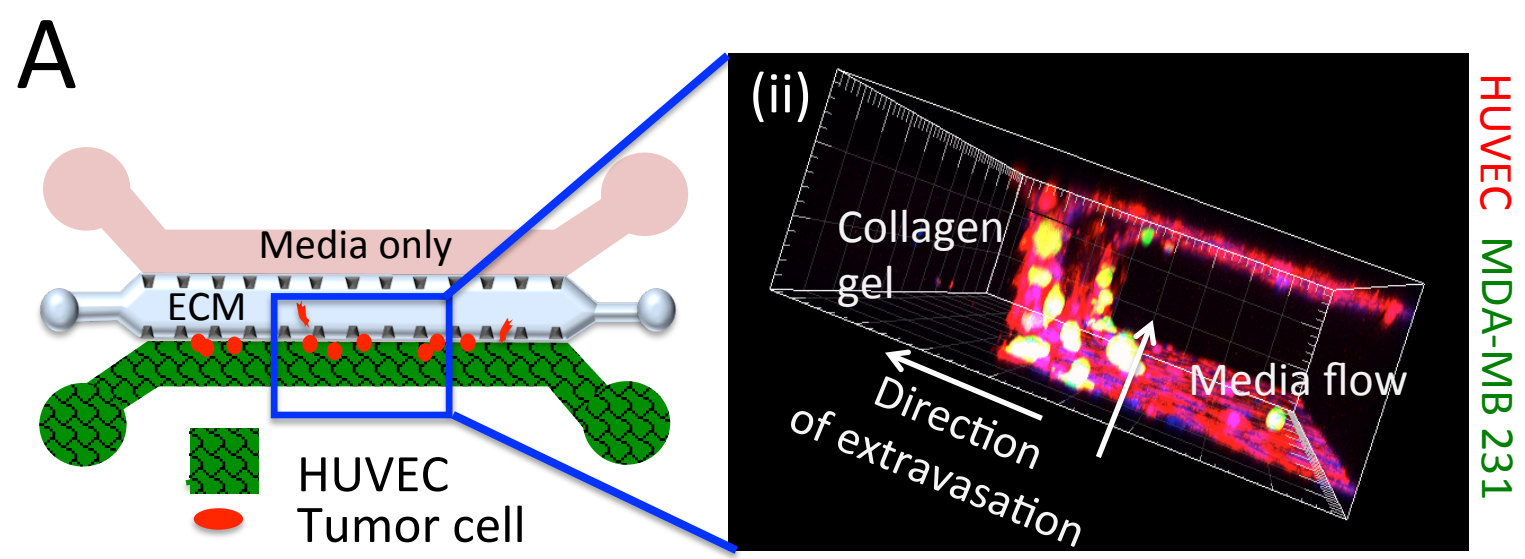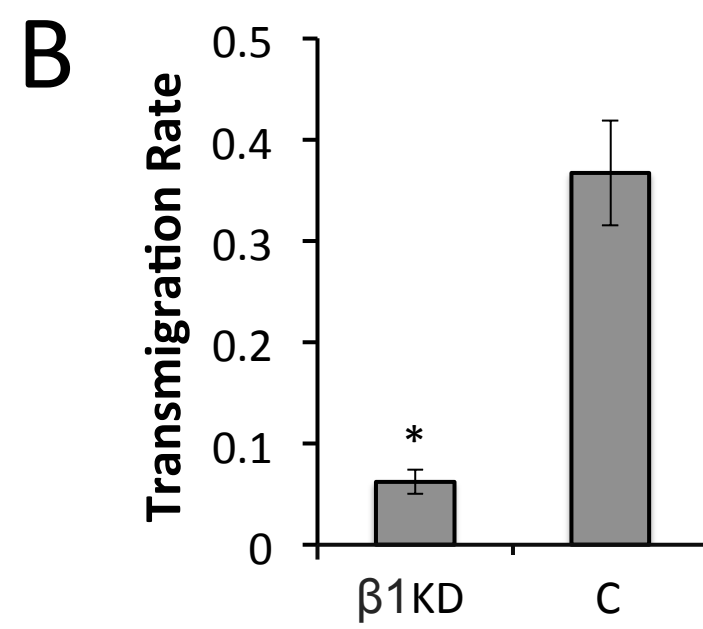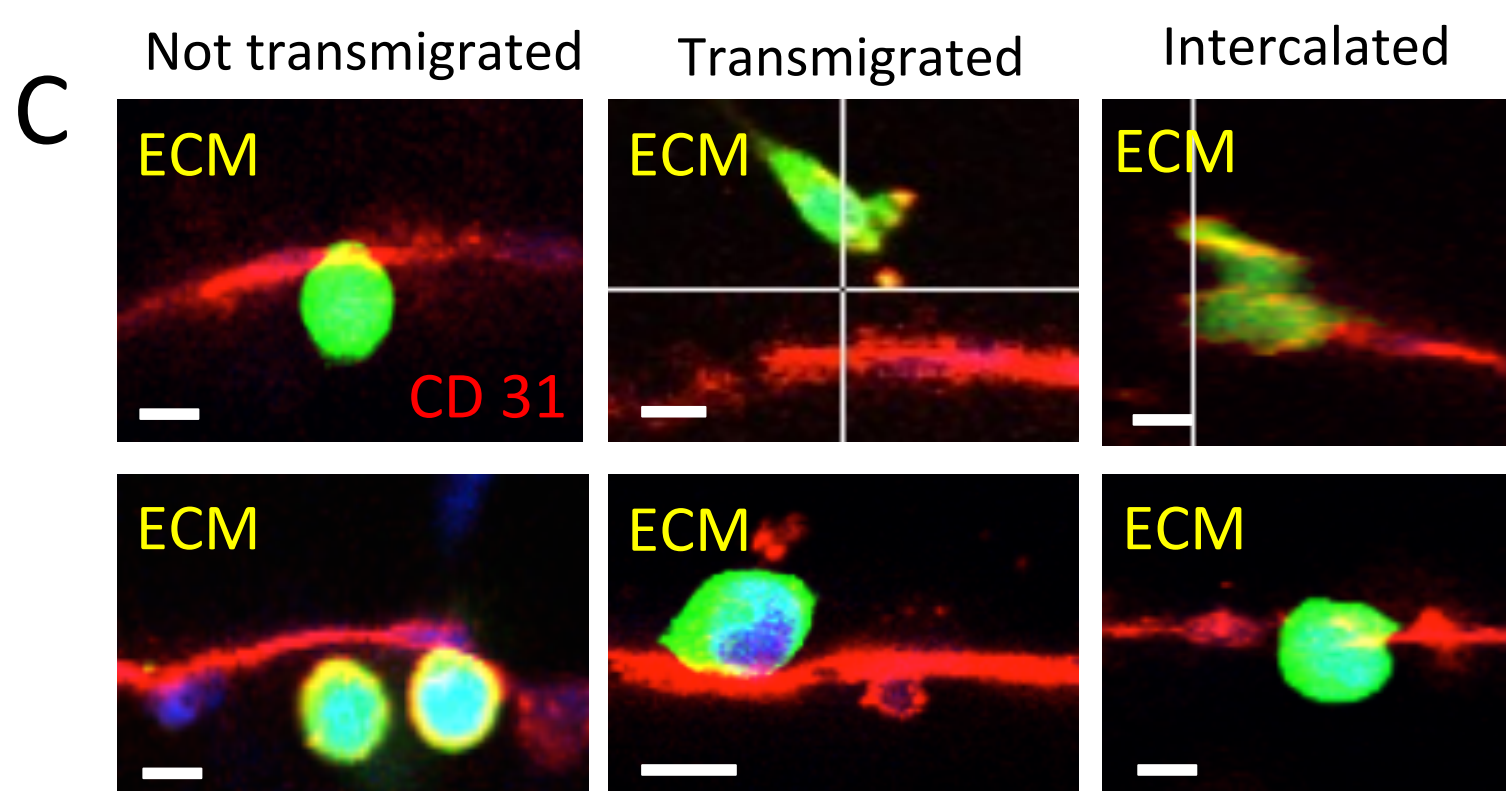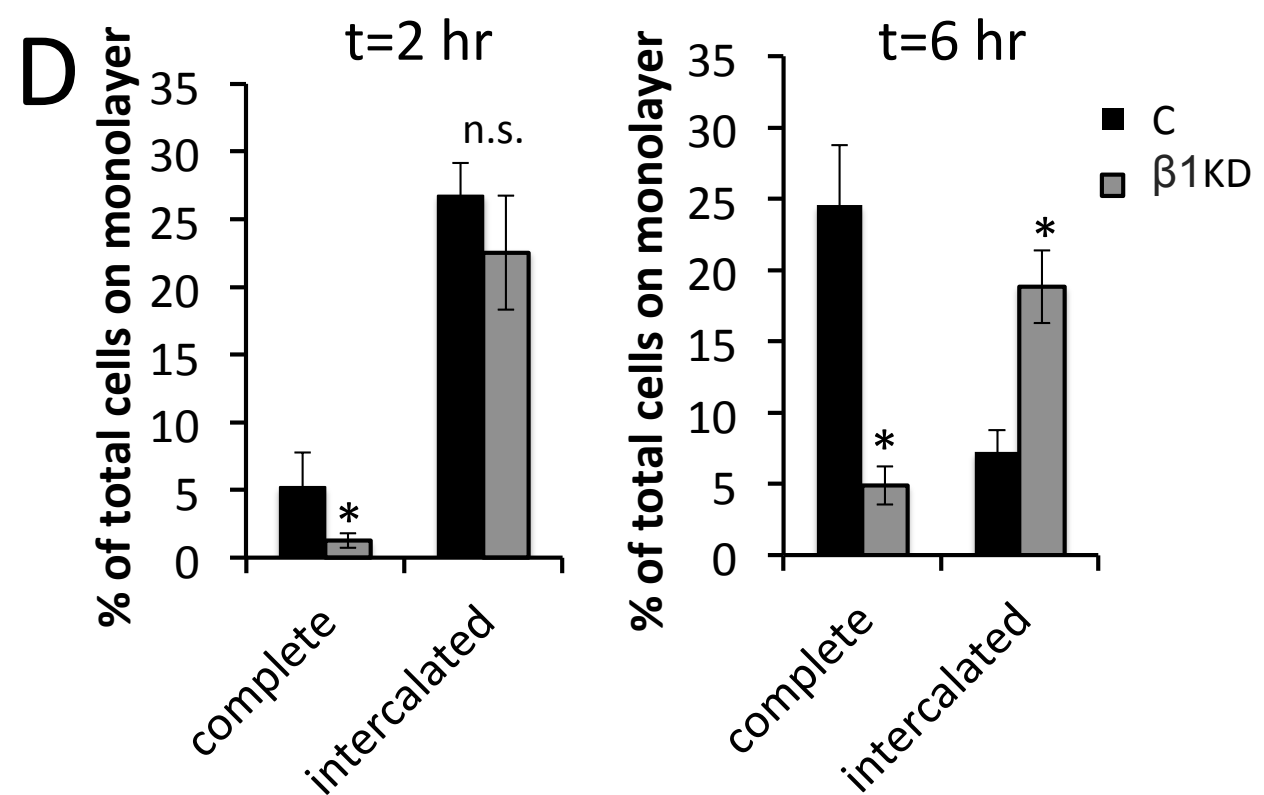

SI Fig 5

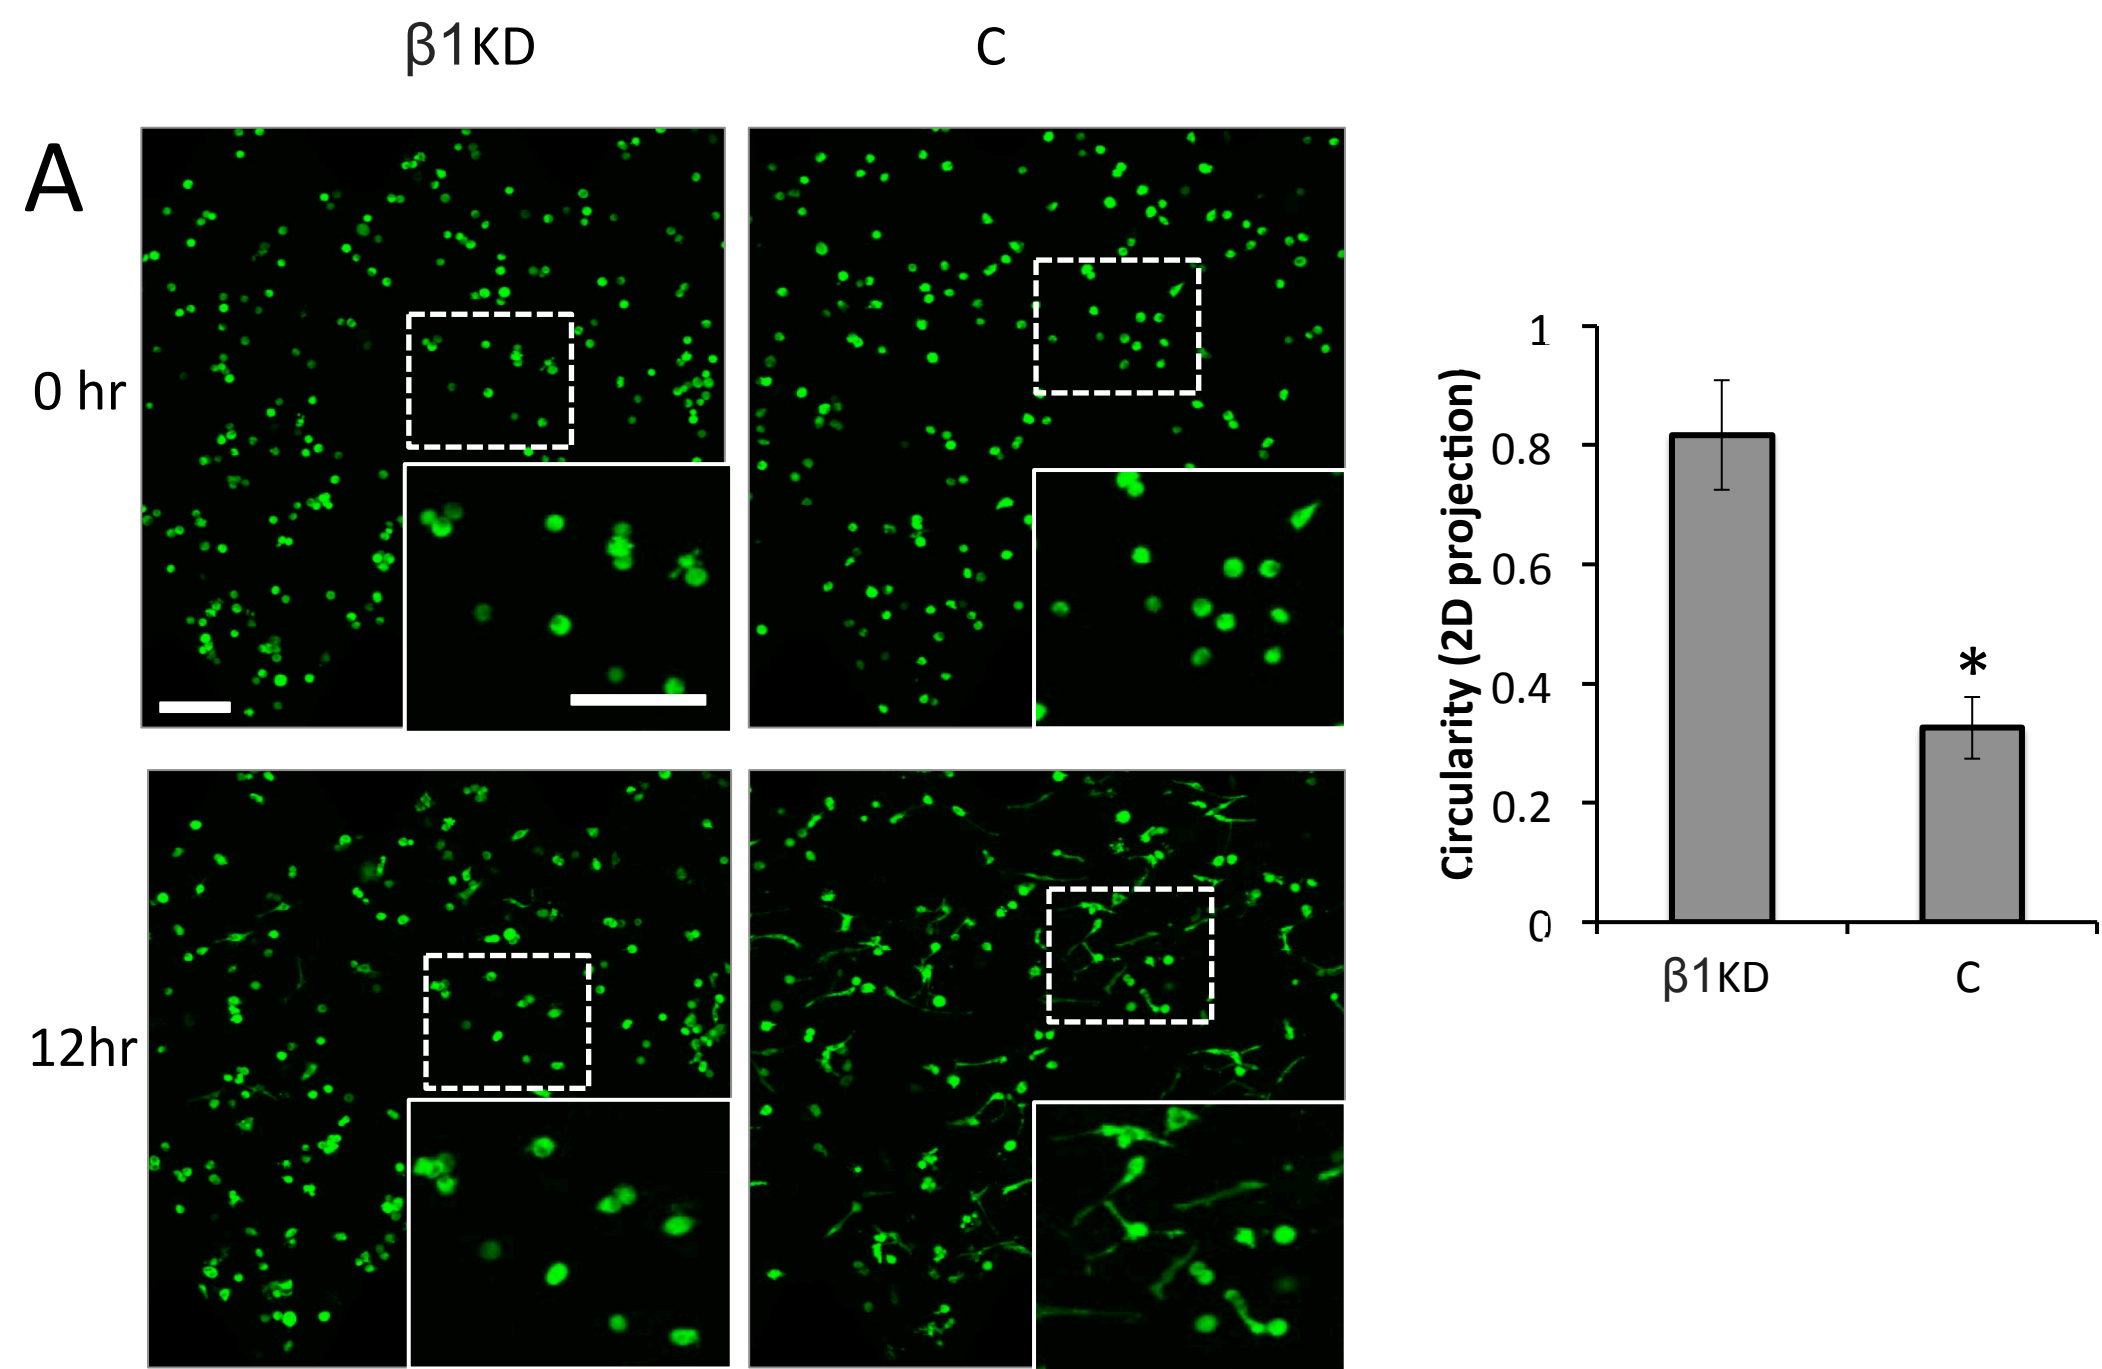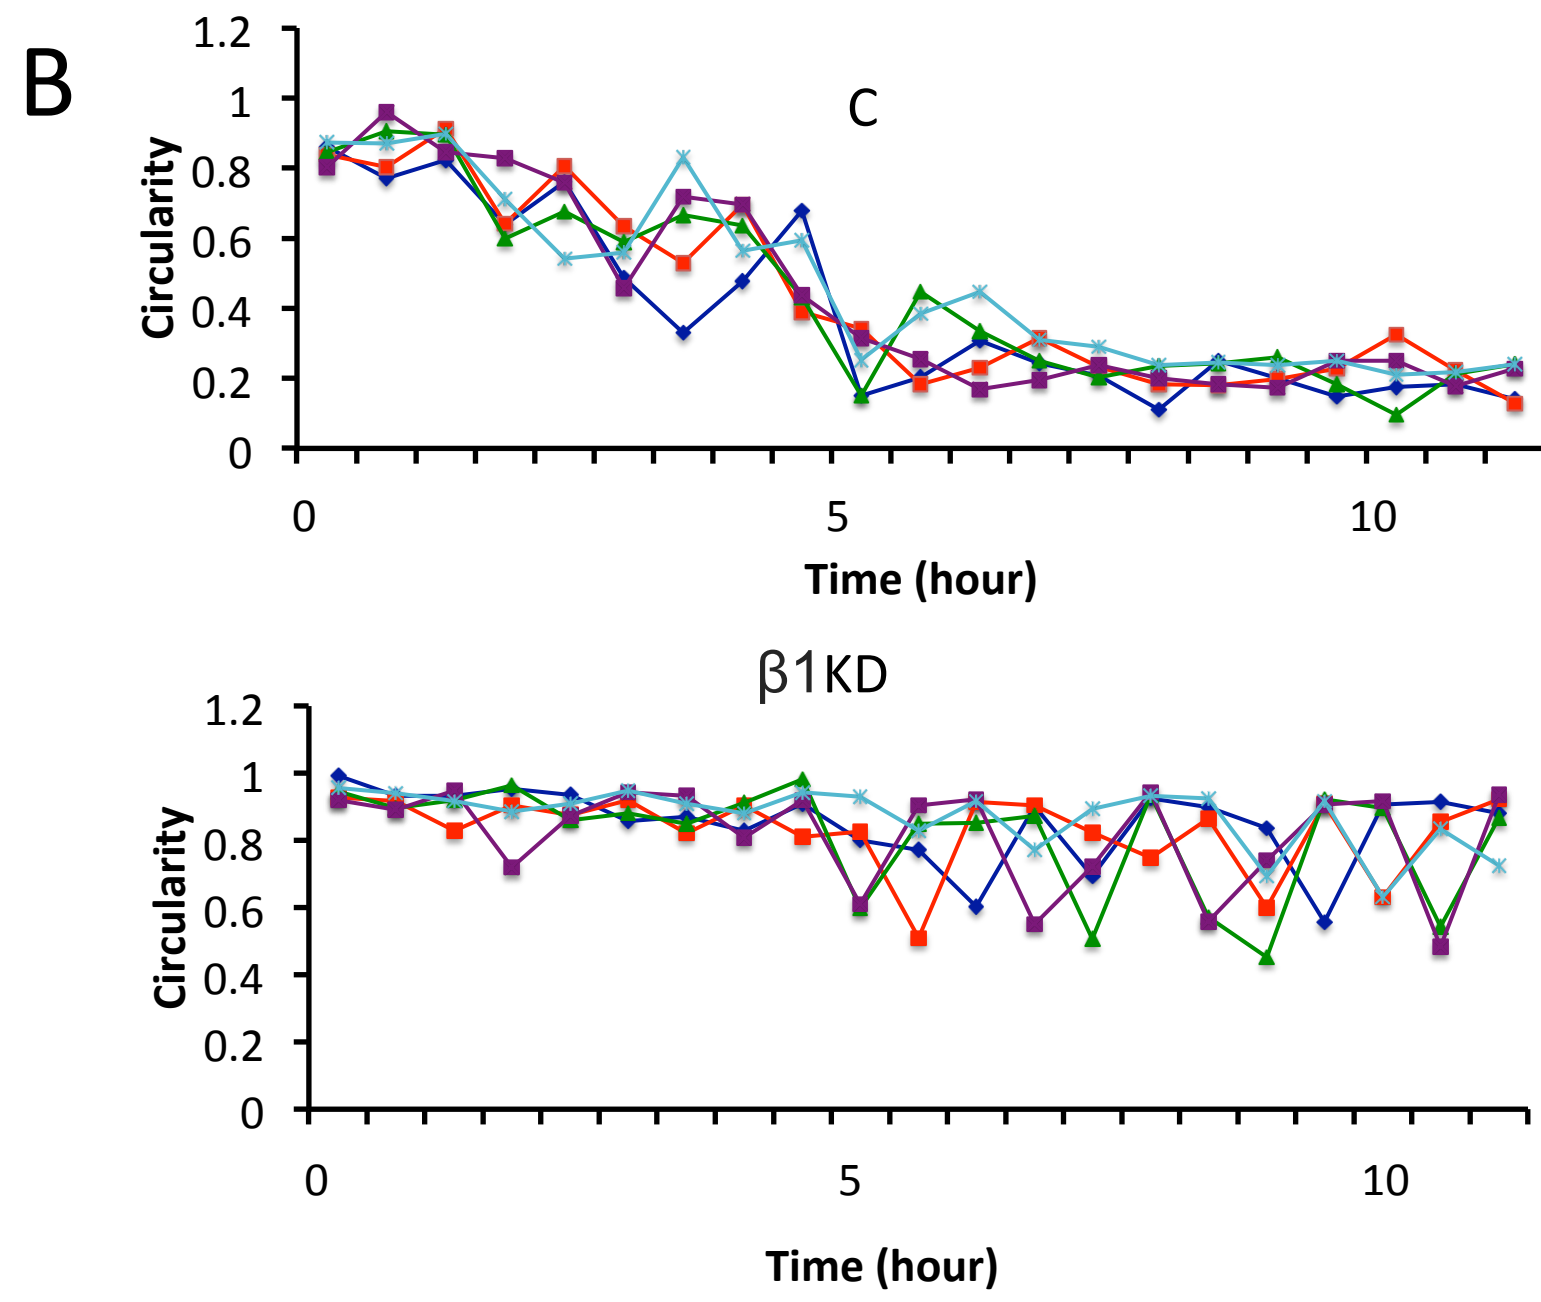

SI Fig 6



**A**

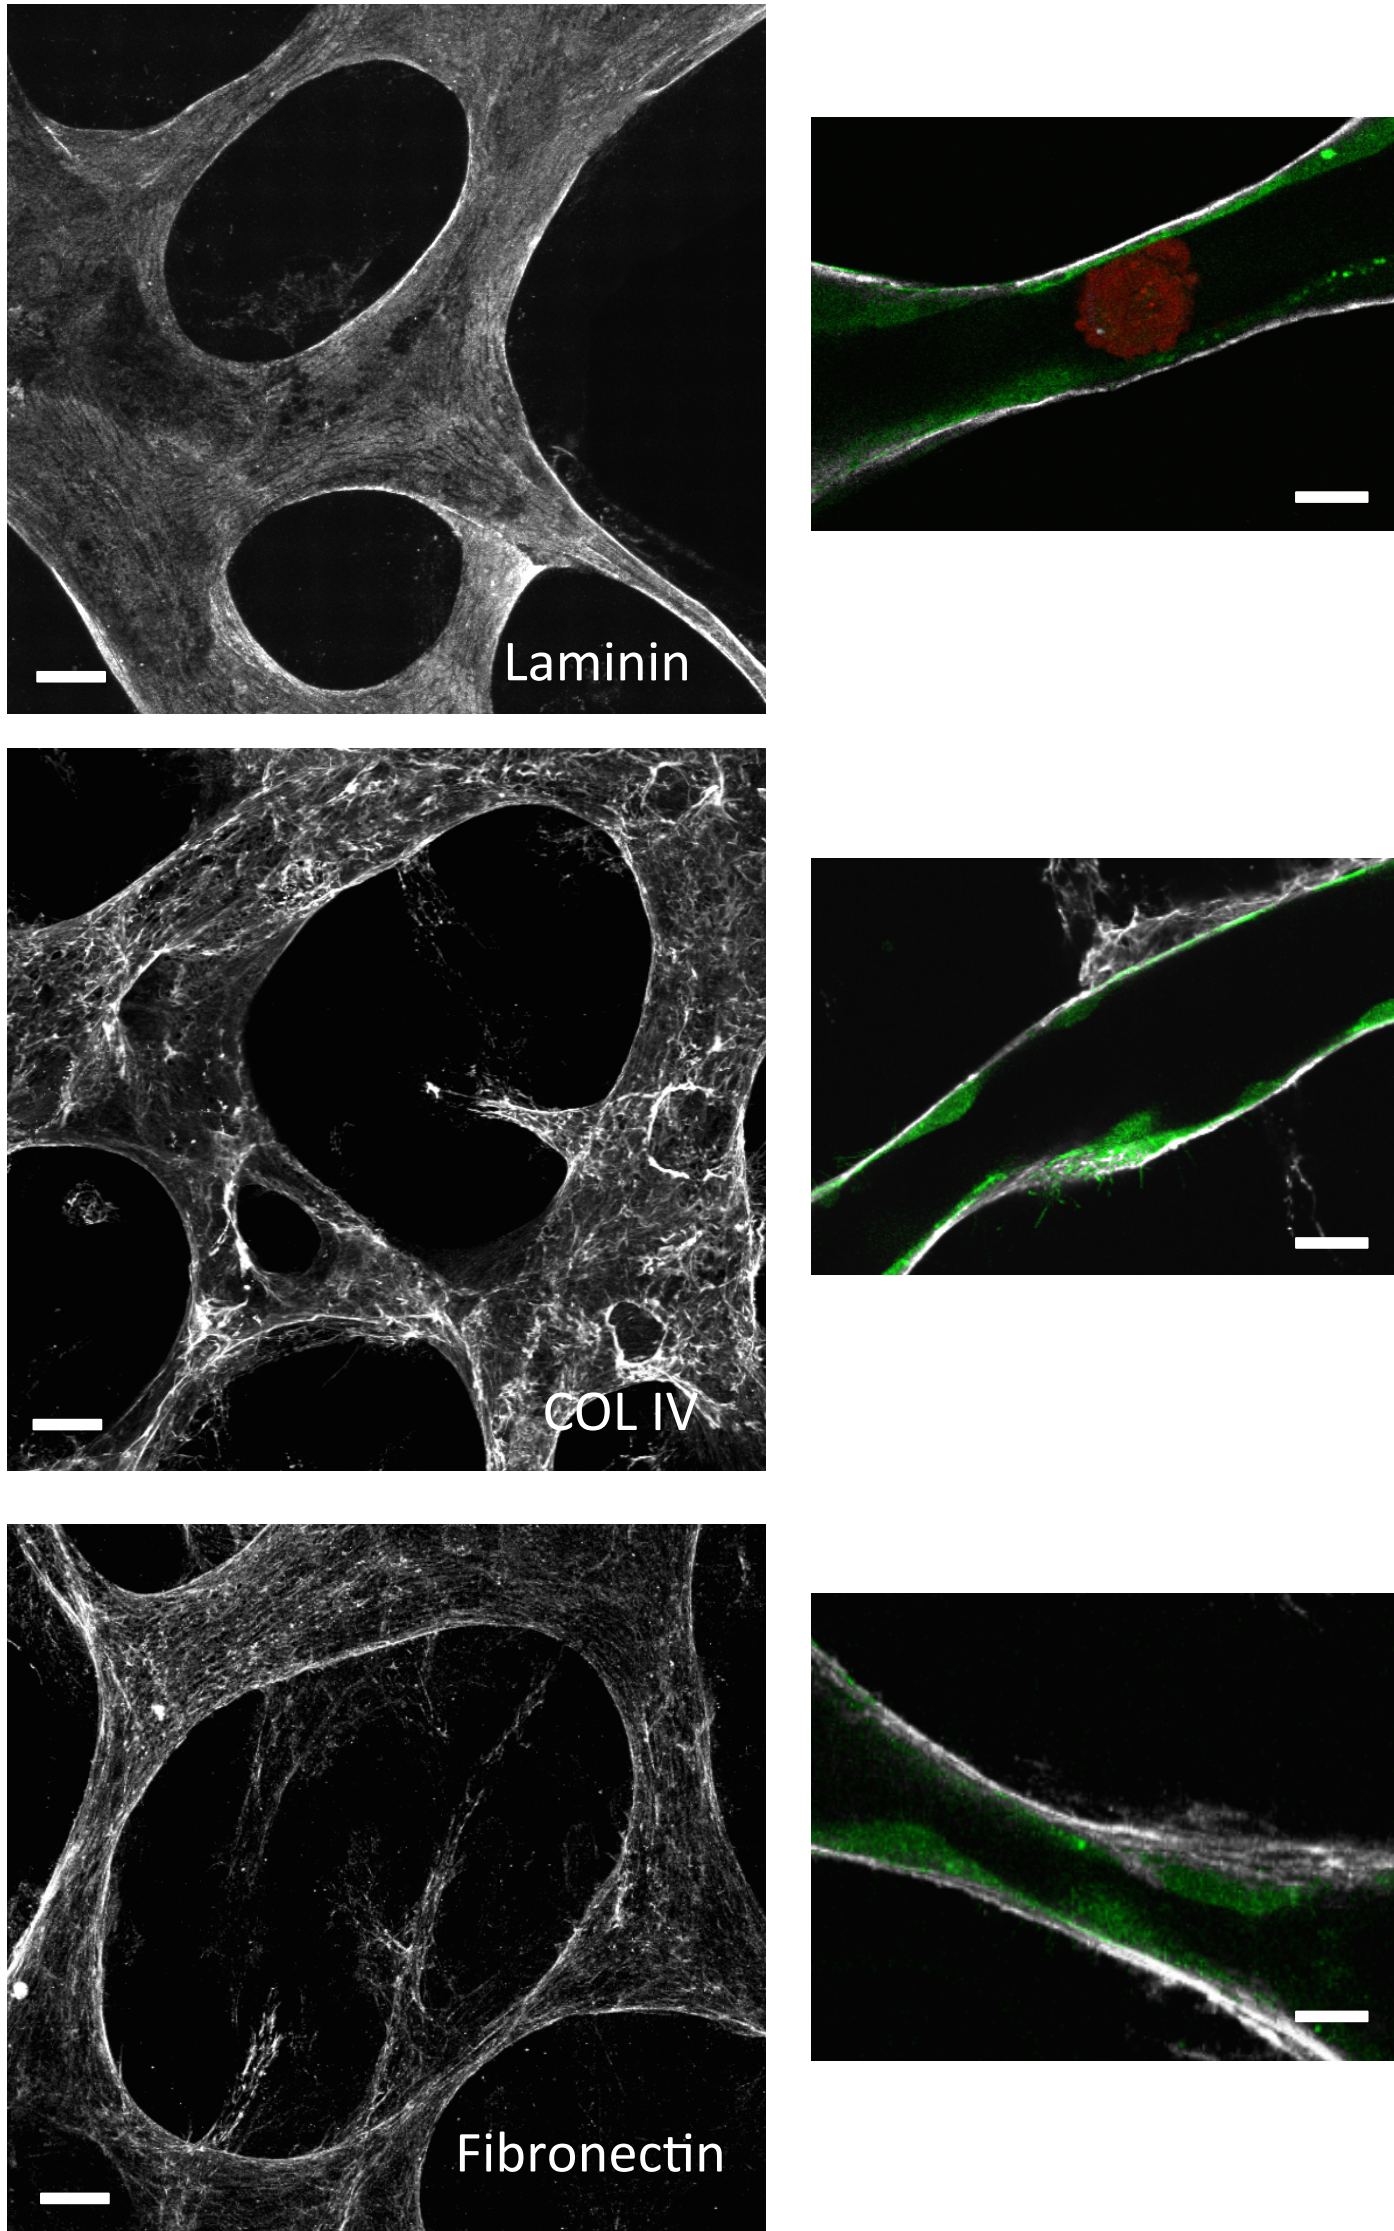

**B**

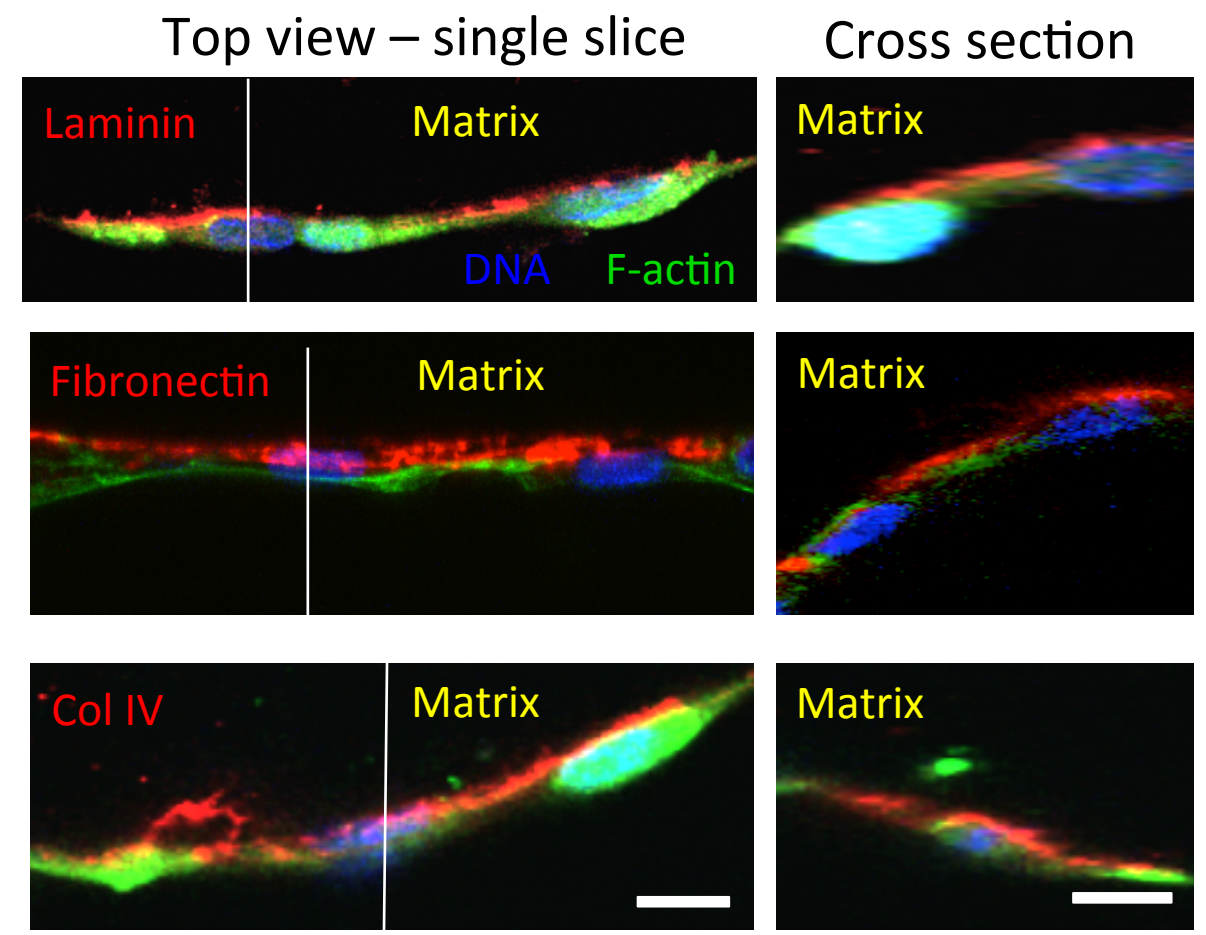

**C**

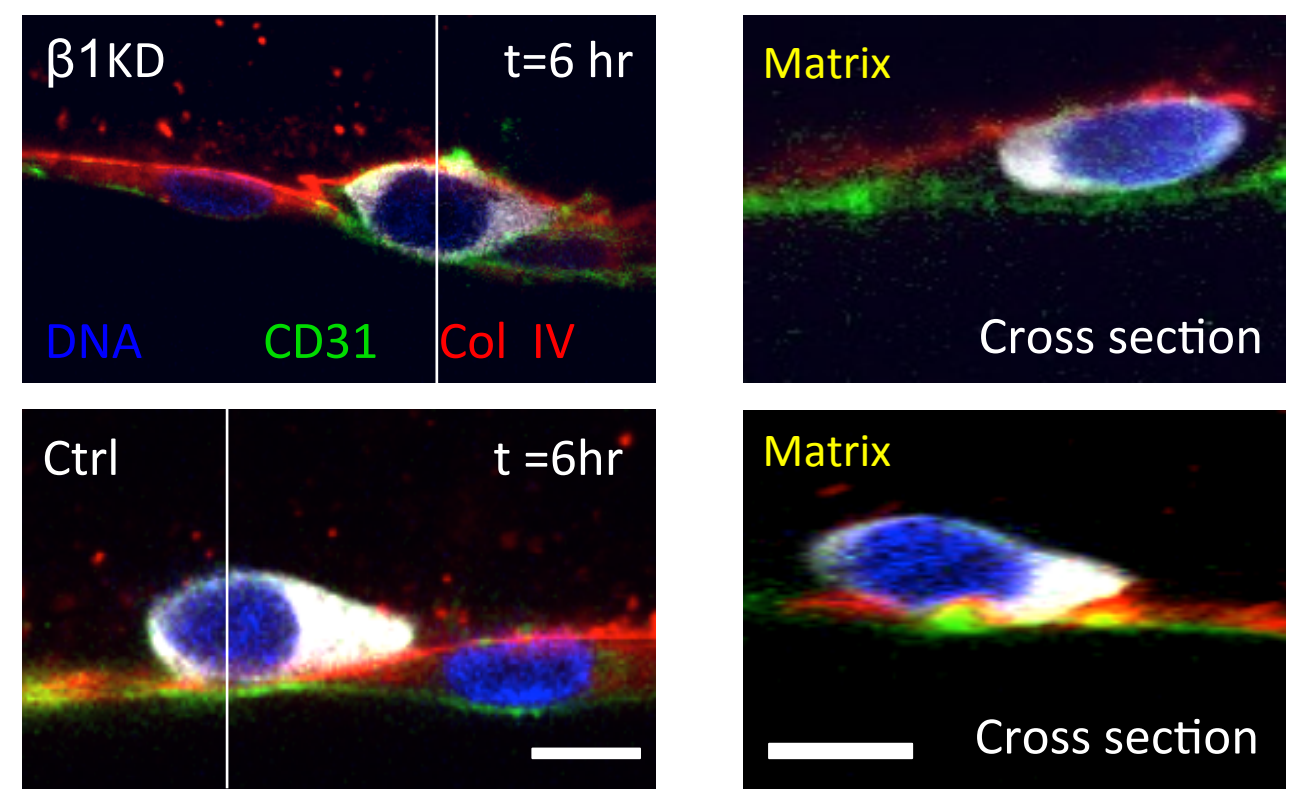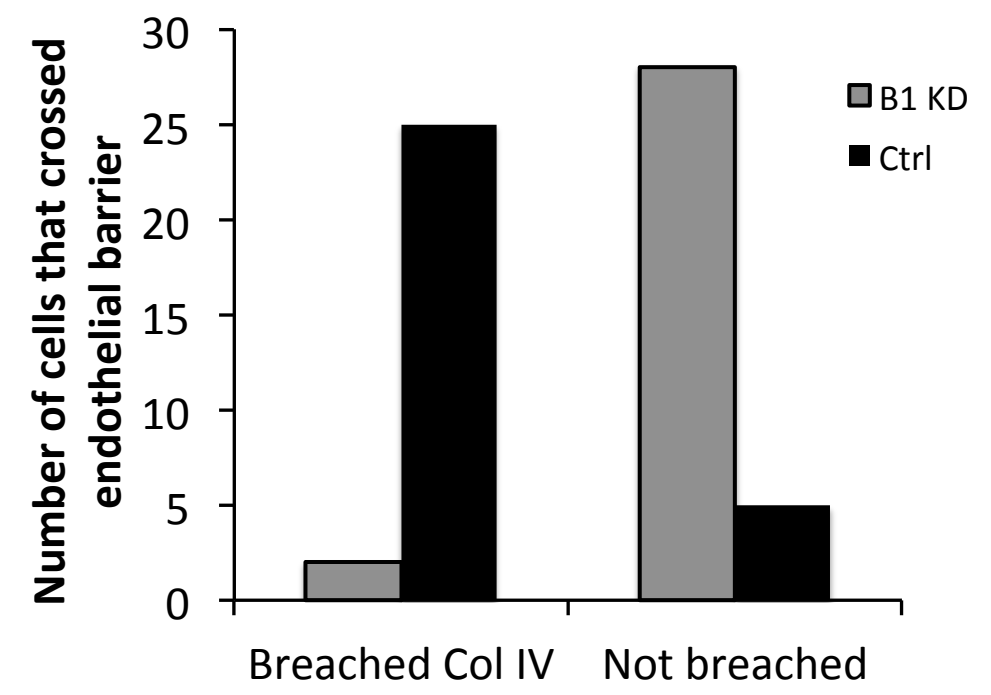

**D**

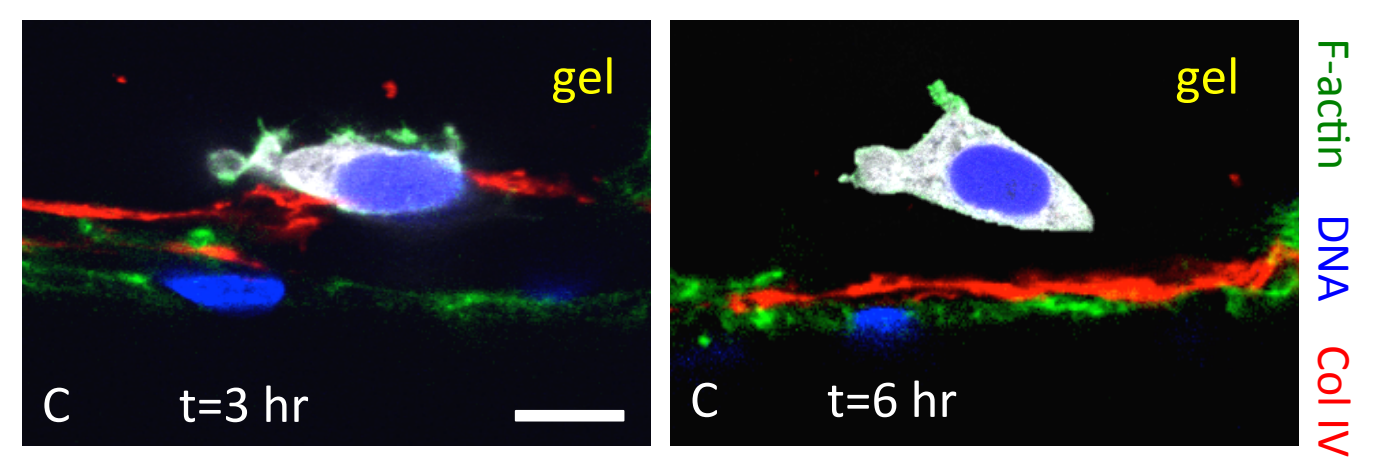

**E**

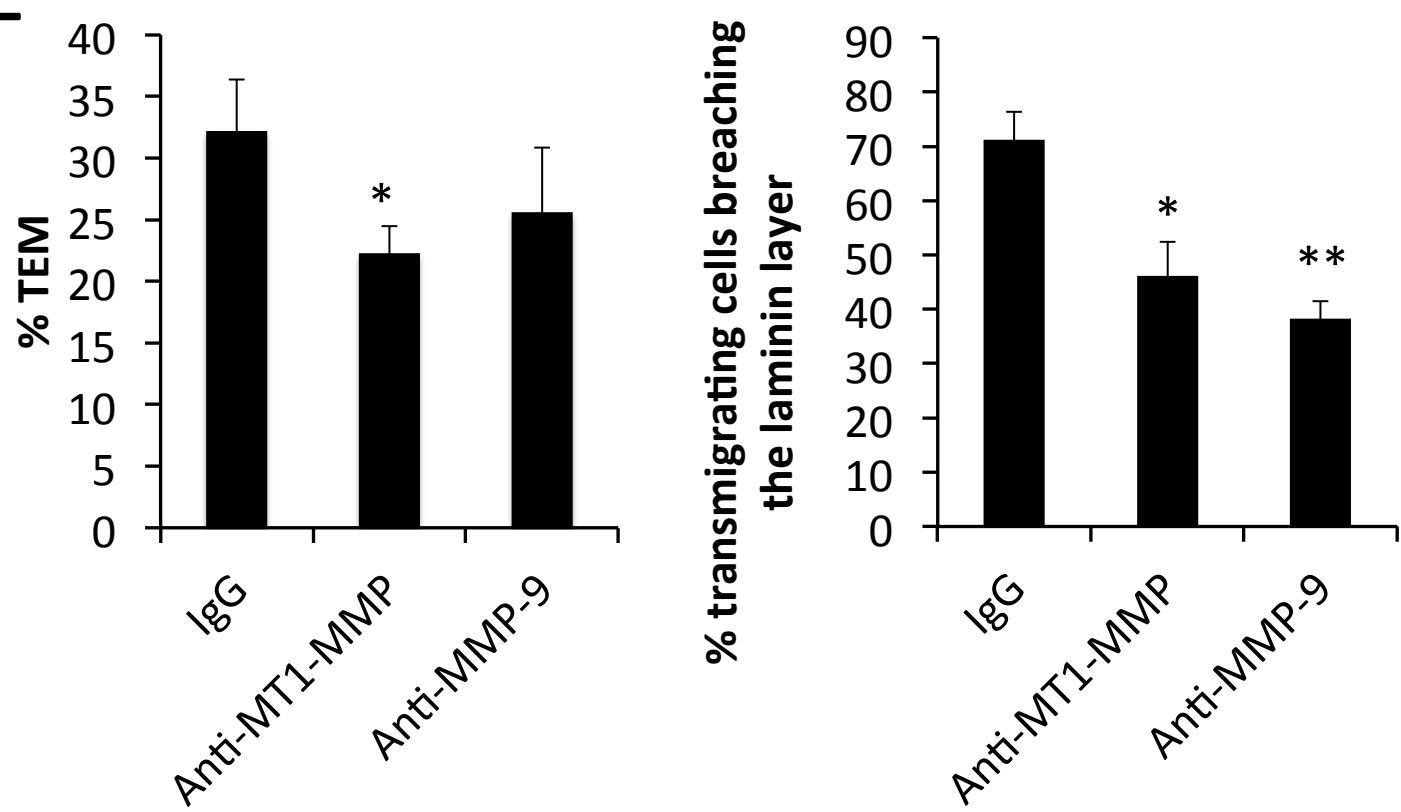



**A**

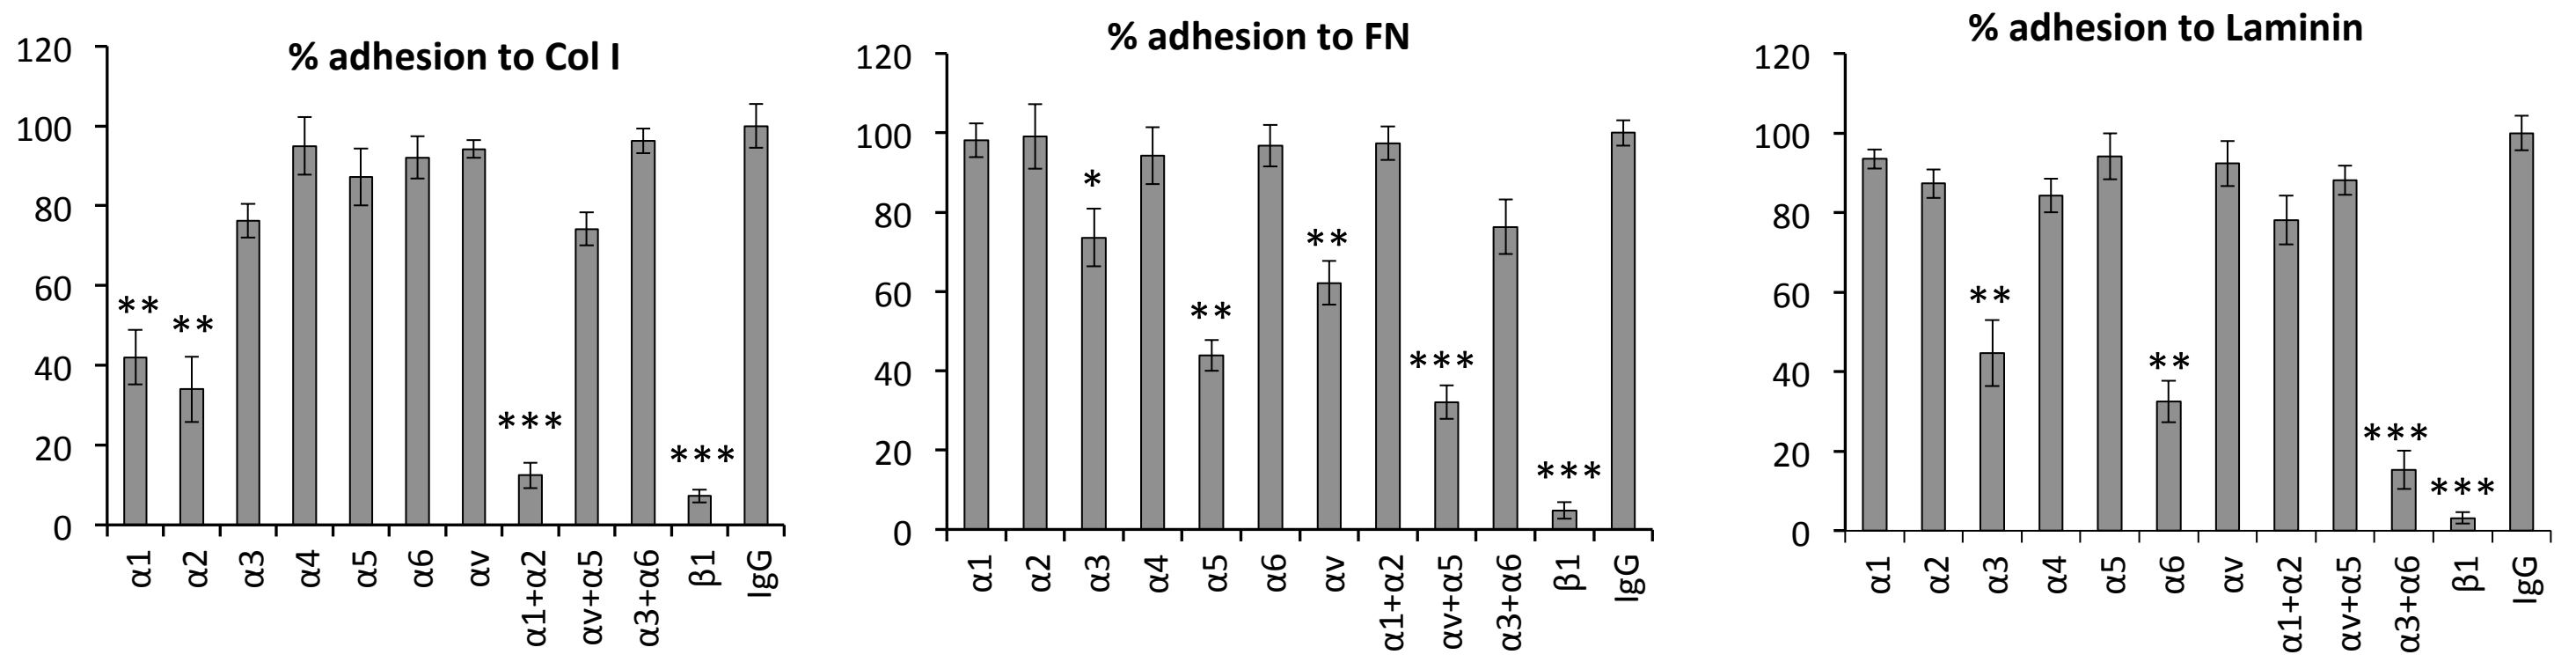

**B**

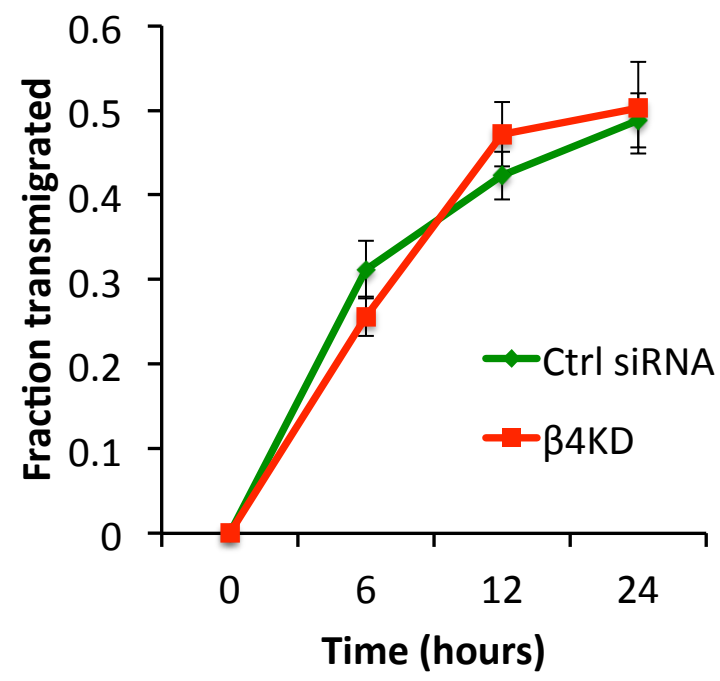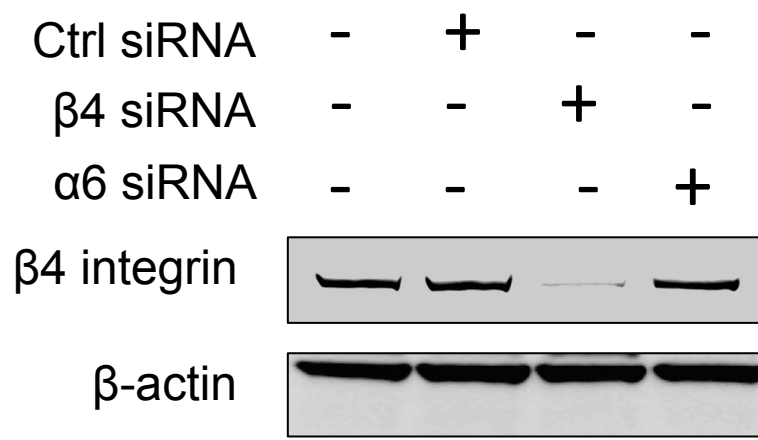

**C**

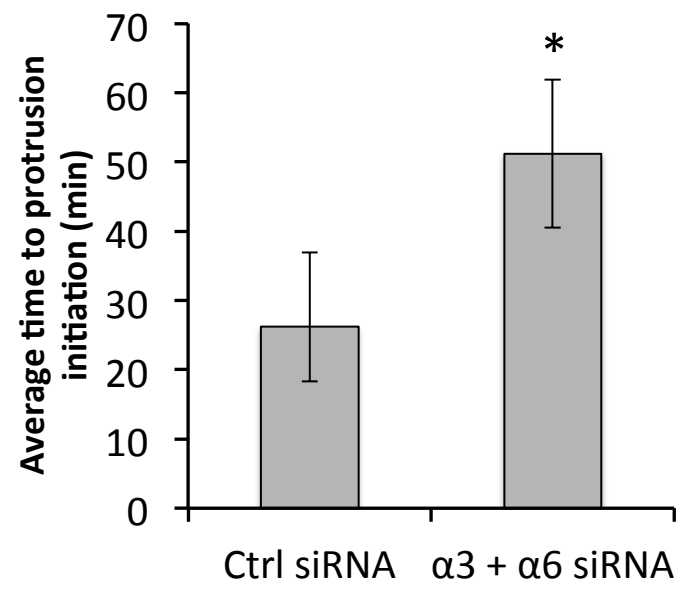

**D**

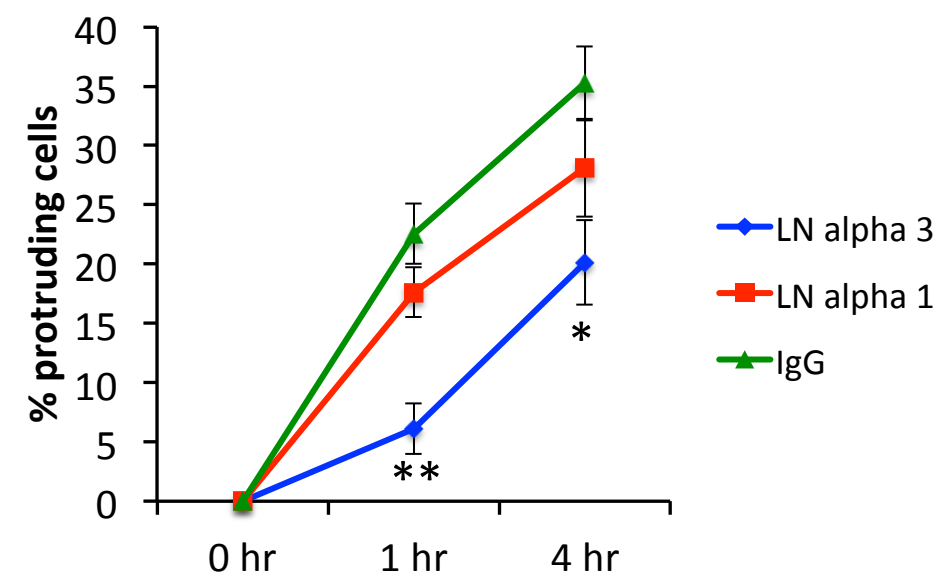

SI Fig 8



| shRNA                          | Species | Sequence                                                                                                |
|--------------------------------|---------|---------------------------------------------------------------------------------------------------------|
| <b>ITGB1-1</b>                 | Human   | TGCTGTTGACAGTGAGCGCCAGATGAAAATAGATGTTAATAGTGAAGCCACAGATGTATTAACATCTATTTTCATCTGTTGCCTACTGCCTCGGA         |
| <b>ITGB1-2</b>                 | Human   | TGCTGTTGACAGTGAGCGCACCCGAGCAATTTTCTGCTAAATAGTGAAGCCACAGATGTATTTAGCAGAAAATTGCTCGGTTTGCCTACTGCCTCGGA      |
| <b>ITGB1-3</b>                 | Human   | TGCTGTTGACAGTGAGCGCCCGAGCAATTTTCTGCTAAAATAGTGAAGCCACAGATGTATTTAGCAGAAAATTGCTCGGTTGCCTACTGCCTCGGA        |
| <b>ITGB1-4</b>                 | Human   | TGCTGTTGACAGTGAGCGACCCGGTAAAATCCTATTTATATAGTGAAGCCACAGATGTATATAAATAGGATTTTACCCGGCTGCCTACTGCCTCGGA       |
| <b>ITGB1-5</b>                 | Human   | TGCTGTTGACAGTGAGCGCTCCACAACTGAATGCAAATAGTGAAGCCACAGATGTATTTGCATTGAGTTGTTGGGATTGCCTACTGCCTCGGA           |
| <b>ITGB1-6</b>                 | Human   | TGCTGTTGACAGTGAGCGAAAGAGGGATAATACAAATGAATAGTGAAGCCACAGATGTATTCATTTGATTATCCCTCTTGCCTACTGCCTCGGA          |
| <b>ITGB1-7</b>                 | Human   | TGCTGTTGACAGTGAGCGAAGCCACAGACATTTACATTAATAGTGAAGCCACAGATGTATTAATGAAATGCTGTGGCTCTGCCTACTGCCTCGGA         |
| <b>ITGB1-8</b>                 | Human   | TGCTGTTGACAGTGAGCGCCGGTAAAATCCTATTTATATAGTGAAGCCACAGATGTATATAAATAGGATTTTACCCGGTGCCTACTGCCTCGGA          |
| <b>ITGB3-1</b>                 | Human   | TGCTGTTGACAGTGAGCGCTCCAACATTTGTTAATAGTTATAGTGAAGCCACAGATGTATACTATTAACAAATGTTGGAATGCCTACTGCCTCGGA        |
| <b>ITGB3-2</b>                 | Human   | TGCTGTTGACAGTGAGCGACCCGCTTCAATGAGGAAGTGAATAGTGAAGCCACAGATGTATTCACCTCCTCATTGAAGCGGGTGCCTACTGCCTCGGA      |
| <b>ITGB3-3</b>                 | Human   | TGCTGTTGACAGTGAGCGAAAGAGCAGATGTCATTCCATATAGTGAAGCCACAGATGTATATGGAATGACATCTGCTCTTGTGCCTACTGCCTCGGA       |
| <b>ITGB3-4</b>                 | Human   | TGCTGTTGACAGTGAGCGATACCCTGAGTTCATAAATTTATAGTGAAGCCACAGATGTATAAATTTATGAAGTACAGGTTAGTGCCTACTGCCTCGGA      |
| <b>ITGB3-5</b>                 | Human   | TGCTGTTGACAGTGAGCGACCCTGCTACCTTACCAATATAGTGAAGCCACAGATGTATATTGGTGAAGGTAGACGTGGCTGCCTACTGCCTCGGA         |
| <b>ITGB3-6</b>                 | Human   | TGCTGTTGACAGTGAGCGCCCGCTACTACTGCAACTGTATAGTGAAGCCACAGATGTATACAGTTGACAGTAGTAGCCGGTGCCTACTGCCTCGGA        |
| <b>ITGB3-7</b>                 | Human   | TGCTGTTGACAGTGAGCGCAAGGGAGAGAGTGTATTGTATAGTGAAGCCACAGATGTATACAATAGCACTCTCTCCCTTTTGCCTACTGCCTCGGA        |
| <b>ITGB3-8</b>                 | Human   | TGCTGTTGACAGTGAGCGCTGGCAGTATGGTAGAGGGATATAGTGAAGCCACAGATGTATATCCCTCTACCATACTGCCATTGCCTACTGCCTCGGA       |
| <b>Firefly Luciferase (FF)</b> |         | AAGGTATATTGCTGTTGACAGTGAGCGAGCTCCCGTGAATTGGAATCCTAGTGAAGCCACAGATGTAGGATTCCAATTCAGCGGGAGCCTGCCTACTGCCTCG |
| <b>ITGA1-2</b>                 | Mouse   | TGCTGTTGACAGTGAGCGCCCAACAAAGTGAATATTCAATAGTGAAGCCACAGATGTATTGAATATTCACITTTGTTGGGTTGCCTACTGCCTCGGA       |
| <b>ITGA1-3</b>                 | Mouse   | TGCTGTTGACAGTGAGCGACCCGGCTAATGTTATATTGTATAGTGAAGCCACAGATGTATACAATATAACATTAGCCGGGGTGCCTACTGCCTCGGA       |
| <b>ITGA1-5</b>                 | Mouse   | TGCTGTTGACAGTGAGCGCCTGGATGGTCATCTTCTGATATAGTGAAGCCACAGATGTATATCAGAAGATGACCATCCAGTTGCCTACTGCCTCGGA       |
| <b>ITGA2-2</b>                 | Mouse   | TGCTGTTGACAGTGAGCGACCCGTGATCTTTCCTAAACAATAGTGAAGCCACAGATGTATTGTTAGGAAAGATCACGGGCTGCCTACTGCCTCGGA        |
| <b>ITGA2-6</b>                 | Mouse   | TGCTGTTGACAGTGAGCGACTGAAAGACCTTACATGAAATAGTGAAGCCACAGATGTATTTGATGGAAGGCTTTTACAGCTGCCTACTGCCTCGGA        |
| <b>ITGA2-7</b>                 | Mouse   | TGCTGTTGACAGTGAGCGCCAGGGCGATGGGATACTTCTATAGTGAAGCCACAGATGTATAGAAGATCCCATCGCCCTGTTGCCTACTGCCTCGGA        |
| <b>ITGA3-1</b>                 | Mouse   | TGCTGTTGACAGTGAGCGAATGGACAATGTTCCGATAAATAGTGAAGCCACAGATGTATTTATCGGAACATTGTCATCTGCCTACTGCCTCGGA          |
| <b>ITGA3-6</b>                 | Mouse   | TGCTGTTGACAGTGAGCGCCAGCTACATGATTGAGCGGAATAGTGAAGCCACAGATGTATCCGCTGAATCATGTAGCTGTTGCCTACTGCCTCGGA        |
| <b>ITGA3-7</b>                 | Mouse   | TGCTGTTGACAGTGAGCGCCCGGATTATGCCCAAGTACCATAGTGAAGCCACAGATGTATGGTACTTGGGCATAATCCGGTGCCTACTGCCTCGGA        |
| <b>ITGA4-1</b>                 | Mouse   | TGCTGTTGACAGTGAGCGCGGGCATCATGTGATCACCAAATAGTGAAGCCACAGATGTATTTGGTGATCACATGATGCCATGCCTACTGCCTCGGA        |
| <b>ITGA4-2</b>                 | Mouse   | TGCTGTTGACAGTGAGCGCCGACATTTCCATCATTATTTAGTGAAGCCACAGATGTAAATAATGATGGTGAATGTCGTTGCCTACTGCCTCGGA          |
| <b>ITGA6-1</b>                 | Mouse   | TGCTGTTGACAGTGAGCGCCACCACAGATCTGGATATTAATAGTGAAGCCACAGATGTATTAATATCCAGATCTGTGGTGTGCCTACTGCCTCGGA        |
| <b>ITGA6-2</b>                 | Mouse   | TGCTGTTGACAGTGAGCGCCGATGCATAGTATTGATCTATAGTGAAGCCACAGATGTATAGATCAATACTATGCATCGGATGCCTACTGCCTCGGA        |
| <b>ITGA6-6</b>                 | Mouse   | TGCTGTTGACAGTGAGCGCTAGGGTGAATTAAGTGAAGCCACAGATGTATTGCCTAAGTTAATCACCCATGCCTACTGCCTCGGA                   |
| <b>ITGA8-2</b>                 | Mouse   | TGCTGTTGACAGTGAGCGAAACCTATAGAATTTAAATCAATAGTGAAGCCACAGATGTATTGATTTAAATCTATAGGTTCTGCCTACTGCCTCGGA        |
| <b>ITGA8-3</b>                 | Mouse   | TGCTGTTGACAGTGAGCGCTGGATGATTCTACCTTTAAATAGTGAAGCCACAGATGTATTTAAAGGTAGAATCATCCAAATGCCTACTGCCTCGGA        |
| <b>ITGA8-5</b>                 | Mouse   | TGCTGTTGACAGTGAGCGCCAGATAATTATTGGCGATGAATAGTGAAGCCACAGATGTATTCATCGCCAATAATTATCTGATGCCTACTGCCTCGGA       |
| <b>ITGAV-9</b>                 | Mouse   | TGCTGTTGACAGTGAGCGCCTGCATTGTGCTTATTGTATTAGTGAAGCCACAGATGTAAACAATAAGACACAATGCAGATGCCTACTGCCTCGGA         |
| <b>ITGAV-10</b>                | Mouse   | TGCTGTTGACAGTGAGCGCGCATAGTACCTCTTCACTTAGTGAAGCCACAGATGTAGTAACTGAAGAGGTAATGCCTACTGCCTCGGA                |
| <b>ITGB1-4</b>                 | Mouse   | TGCTGTTGACAGTGAGCGACCCAGACGGAGTAAACAATAAATAGTGAAGCCACAGATGTAAATTTATTGTTACTCCGTCTGGCTGCCTACTGCCTCGGA     |
| <b>ITGB1-5</b>                 | Mouse   | TGCTGTTGACAGTGAGCGCGGCTCTCAAATAAAGAAATAGTGAAGCCACAGATGTATTTCTTATAGTTTGGAGAGCTTGCCTACTGCCTCGGA           |
| <b>ITGB2-1</b>                 | Mouse   | TGCTGTTGACAGTGAGCGCGCCATCTTTGCGGTGACAAATAGTGAAGCCACAGATGTATTTGTCACCGCAAAGATGGGCTTGCCTACTGCCTCGGA        |
| <b>ITGB2-4</b>                 | Mouse   | TGCTGTTGACAGTGAGCGAGGAAGGCTGTTGGATACTTATAGTGAAGCCACAGATGTATAAGTTATCCAACAGCCTTCCGTGCCTACTGCCTCGGA        |
| <b>ITGB2-5</b>                 | Mouse   | TGCTGTTGACAGTGAGCGAGGAAACAGCTATCTCCACAAATAGTGAAGCCACAGATGTATTTGTGGAGATAGCTGTTCCGTGCCTACTGCCTCGGA        |
| <b>ITGB3-2</b>                 | Mouse   | TGCTGTTGACAGTGAGCGCGCAAAACCCGCTGTATAAATAGTGAAGCCACAGATGTATTTATACAGCGGGTGTGTTGCTTGCCTACTGCCTCGGA         |
| <b>ITGB3-3</b>                 | Mouse   | TGCTGTTGACAGTGAGCGACCTCTCAGATGCGCAAGCTTATAGTGAAGCCACAGATGTATAAGCTTGCATCTGAGAGGCTGCCTACTGCCTCGGA         |
| <b>ITGB3-9</b>                 | Mouse   | TGCTGTTGACAGTGAGCGAGCAGGCATTGTCTGCCCAATAGTGAAGCCACAGATGTAAATGGGCAGGACAATGCCTGCCTACTGCCTCGGA             |
| <b>ITGB3-10</b>                | Mouse   | TGCTGTTGACAGTGAGCGAGGAAGGAATTTGCTAAATTTGATAGTGAAGCCACAGATGTACAAATTTAGCAAATTCCTTCCGTGCCTACTGCCTCGGA      |
| <b>ITGB4-4</b>                 | Mouse   | TGCTGTTGACAGTGAGCGACAGGGTGGAGAAGACTACGAATAGTGAAGCCACAGATGTATTCGTAGTCTTCCACCCTGGTGCCTACTGCCTCGGA         |
| <b>ITGB4-7</b>                 | Mouse   | TGCTGTTGACAGTGAGCGAAGGGTGGAGAAGACTACGAATAGTGAAGCCACAGATGTATTCGTAGTCTTCCACCCTGTGCCTACTGCCTCGGA           |

Supplemental Table 1

| <b>4T1 Cell Line</b> | <b>% Protein Remaining</b> |
|----------------------|----------------------------|
| FF10                 | N/A                        |
| FF32                 | N/A                        |
| Alpha1-2             | 28±8.6                     |
| Alpha1-3             | 63±15.4                    |
| Alpha1-5             | 47±6.7                     |
| Alpha2-2             | 35±0.5                     |
| Alpha2-6             | 37±10                      |
| Alpha2-7-            | 5±1.6                      |
| Alpha3-1-BC-G8       | <10% *                     |
| Alpha3-6-BC-B4       | <10% *                     |
| Alpha3-7-BC-B6       | <10% *                     |
| Alpha4-1-BC-A8       | Protein not detected       |
| Alpha4-2-BC-A2       | Protein not detected       |
| alpha6-1-BC B1       | 12 ±7                      |
| alpha6-2-BC A12      | 12 ±7                      |
| alpha6-6-BC A11      | 21 ±7                      |
| alpha8-2 BC H1       | 6.9 **                     |
| alpha8-3 BC H3       | 13.48 **                   |
| alpha8-5 BC H5       | 7.89 **                    |
| AlphaV-9-BC-E3       | <10% *                     |
| AlphaV-10-BC-E4      | <10% *                     |
| beta1-4-BC A3        | 17±2                       |
| beta1-5-BC A4        | 9±3                        |
| beta2-1-C5           | 9±4                        |
| beta2-4-BC-A6        | 20±4                       |
| beta2-5-BC-A7        | 33±11                      |
| beta3-2-BC-E7        | 15±6.2                     |
| beta3-3-BC-E9        | 42±18.5                    |
| beta3-9-BC-E11       | 42±21.5                    |
| beta3-10-BC-F1       | 1.2±6.2                    |
| beta4-4-BC-F10       | 9±1                        |
| beta4-7-BC-F8        | 7±1                        |

\* Knockdown was confirmed by western blots

\*\* Knockdown was confirmed by qPCR

## Supplemental Table 2
